# Supplementary material for: TALE factors use two distinct functional modes to control an essential zebrafish gene expression program
Source: eLife journal article supplement (doi:10.7554/elife.36144), 2018-06-18

Figure 4 - figure supplement 1

A

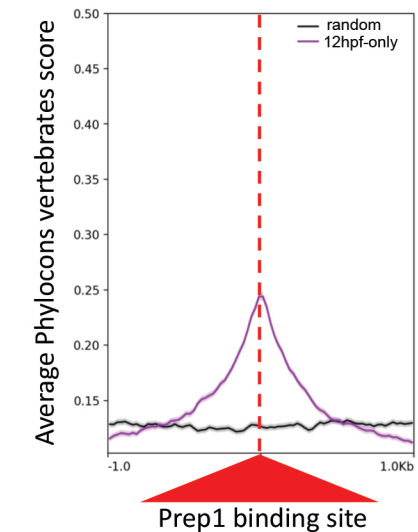

B

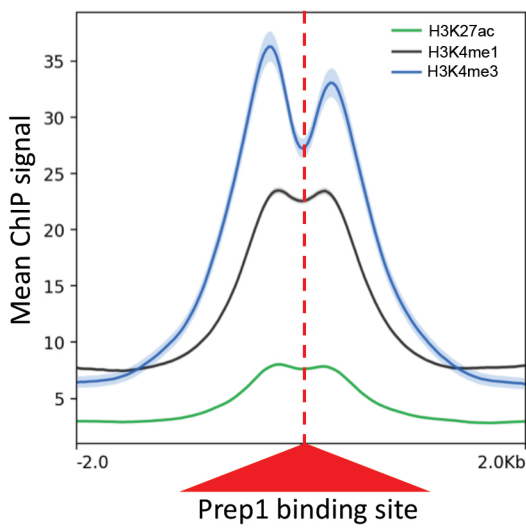

C

| Hindbrain enhancer (Grice et al, 2015) | Zv9 Genomic coordinates |          |          |
|----------------------------------------|-------------------------|----------|----------|
|                                        | chr                     | start    | end      |
| dachd_11206                            | chr9                    | 31878398 | 31878784 |
| fign_5161                              | chr9                    | 51769339 | 51769822 |
| foxd3_330                              | chr6                    | 31915136 | 31915524 |
| foxp1_892                              | chr6                    | 43591324 | 43591618 |
| hoxd_10479                             | chr9                    | 2272056  | 2272403  |
| hoxd_10483                             | chr9                    | 2229379  | 2229552  |
| maf_11498                              | chr18                   | 29644566 | 29644811 |
| meis1_1705                             | chr13                   | 5154678  | 5155060  |
| nr2f2_8394                             | chr18                   | 23841641 | 23841860 |
| pbx3b_3211                             | chr8                    | 34837741 | 34838387 |
| pou3f1_7785                            | chr16                   | 35670348 | 35670630 |
| pou3f2b_9802                           | chr16                   | 34702796 | 34703234 |
| shox2_5643                             | chr15                   | 2132353  | 2132810  |
| znf503_10147                           | chr13                   | 17323780 | 17324188 |
| znf503_10156                           | chr13                   | 17371825 | 17372350 |
| znf503_10193                           | chr13                   | 17573753 | 17574151 |
| znf503_10196                           | chr13                   | 17579861 | 17580019 |
| znf703_10876                           | chr5                    | 26134939 | 26135234 |
| znf703_10897                           | chr5                    | 25991875 | 25992115 |

D

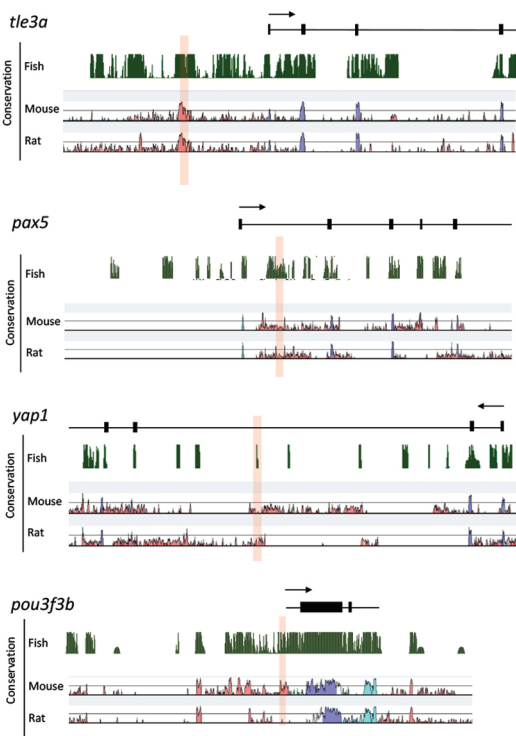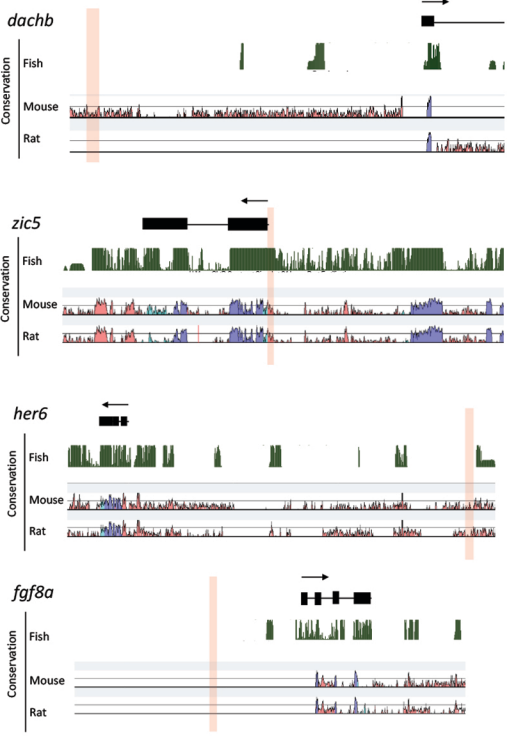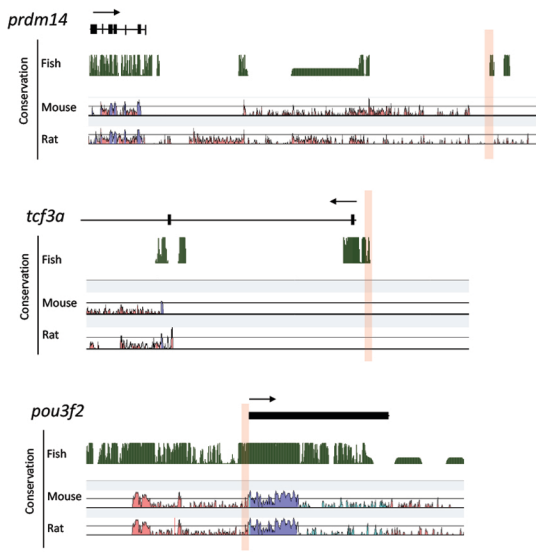

Supplement: supp [file elife-36144-supp-v1.zip]
