# Supplementary material for: TALE factors use two distinct functional modes to control an essential zebrafish gene expression program
Source: eLife journal article supplement (doi:10.7554/elife.36144), 2018-06-18

Figure 7 - figure supplement 1

A

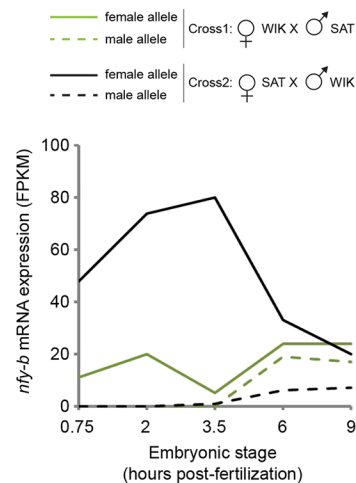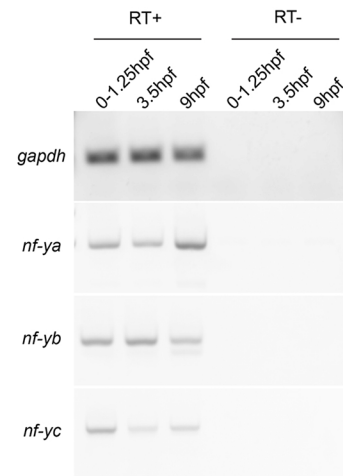

B

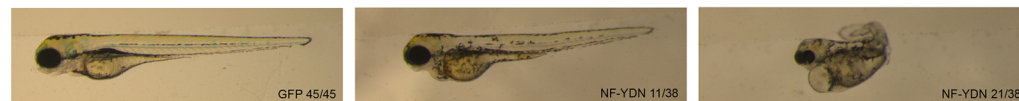

C

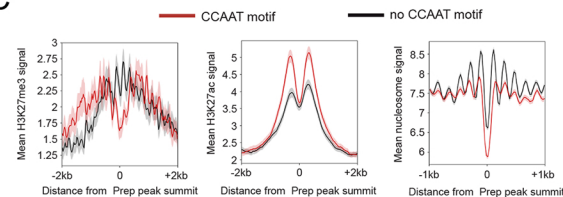

D

|                       | DECA       | HEXA   | TALE:Hox | NF-Y    |
|-----------------------|------------|--------|----------|---------|
|                       | TGABTGACAB | TGACAG | TGATNNAT | RCCAATM |
| 12hpf-only            | 7.4        | 44.9   | 25.1     | 21.1    |
| 3.5hpf                | 75.9       | 11.1   | 15.0     | 32.8    |
| MPADs                 | 46.9       | 22.9   | 16.5     | 35.9    |
| class1 MPADs          | 29.6       | 24.1   | 16.4     | 37.9    |
| class2 MPADs          | 43.1       | 21.3   | 16.0     | 37.4    |
| class3 MPADs          | 52.1       | 22.9   | 15.7     | 35.0    |
| class4 MPADs          | 44.9       | 27.6   | 22.8     | 35.3    |
| non-MPADs             | 85.0       | 7.3    | 14.4     | 31.5    |
| all MPADs near DEG    | 44.4       | 28.5   | 15.2     | 34.4    |
| class3 MPADs near DEG | 52.6       | 28.2   | 16.7     | 26.9    |
| class4 MPADs near DEG | 42.4       | 30.3   | 12.1     | 36.4    |

E

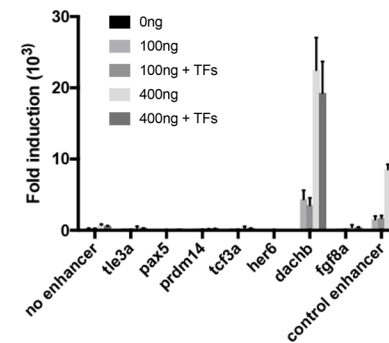

F

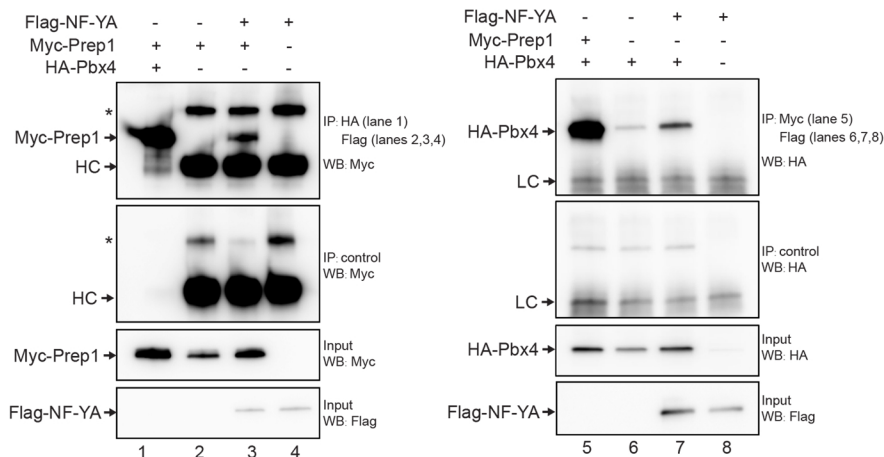

G

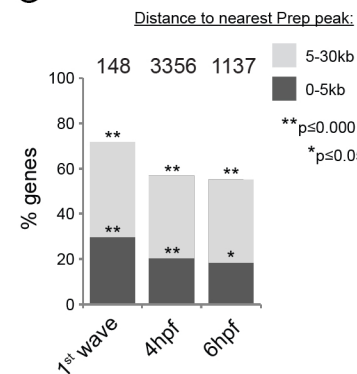

H

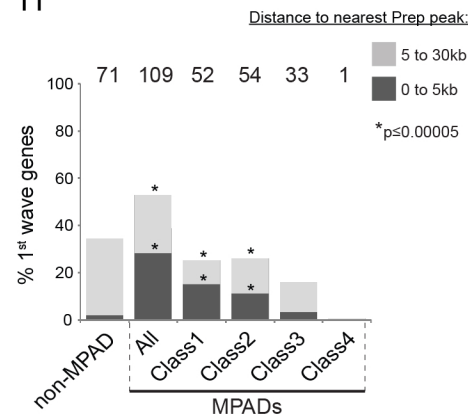

Supplement: supp [file elife-36144-supp-v1.zip]
