# Supplementary material for: TALE factors use two distinct functional modes to control an essential zebrafish gene expression program
Source: eLife. 2018 Jun 18;7:e36144. doi: 10.7554/eLife.36144 (PMC6023610; doi:10.7554/eLife.36144)
Supplement: Supplementary file 2. — Related to Figure 4D. GREAT analysis (association rule = single nearest gene within 30 kb) was used to identify GO-terms for each MPAD population. Significant GO terms (FDR ≤ 0.05; -log2FDR ≤ 4.32) associated with any MPAD population were then merged using the ‘join two files’ tool in Galaxy to produce a list of 231 GO-terms associated with a –log2 (FDR) value for each MPAD population. Finally, GO terms and their corresponding –log2 (FDR) values were grouped (1-8) based on their association with the various MPAD populations. Note that Class 4 MPADs are enriched near genes involved in embryonic development, including processes related to the TALE loss-of-function phenotype (nervous system, eye and heart development; Group 5). N.S. = not significant. [file elife-36144-supp2.xlsx]

## Sheet: Legend
	Supplementary file 2. GO terms associated with Prep MPAD populations. Related to Figure 4D.
	GREAT analysis (association rule = single nearest gene within 30kb) was used to identify GO-terms for each MPAD population. Significant GO terms (FDR ≤0.05; -log2FDR ≤4.32) associated with any MPAD population were then merged using the “join 2 files” tool in Galaxy to produce a list of 231 GO-terms associated with a –log2 (FDR) value for each MPAD population. Finally, GO terms and their correspon…
	Footnotes:
	a. Biological GO terms associated with MPAD populations as determined by GREAT analysis (using single nearest gene within 30kb mode)
	b. Values indicate -log2(FDR) for each GO term. Only Go terms with FDR ≤0.05 (-log2FDR=4.32) were considereed significant. N.S = no significant association
	c. GO term groups	Group 1	Associated with All, Class1, 2 and 4 MPADs
		Group 2	Associated with All, Class1 and 4 MPADs
		Group 3	Associated with All, Class2 and 4 MPADs
		Group 4	Associated with All and Class2 MPADs
		Group 5	Associated with All and Class4 MPADs
		Group 6	Associated with all MPADs only
		Group 7	Associated with Class1 MPADs only
		Group 8	Associated with Class4 MPADs only

## Sheet: GO term heatmap
	False Discovery Rateb
Biological GO terms identified by GREATa	All MPADs	Class1	Class2	Class3	Class4	Groupsc
regulation of macromolecule metabolic process	227	26	42	N.S	268	1
regulation of cellular metabolic process	226	24	49	N.S	259
regulation of gene expression	225	25	43	N.S	270
regulation of cellular macromolecule biosynthetic process	222	28	38	N.S	271
regulation of macromolecule biosynthetic process	222	28	39	N.S	271
regulation of primary metabolic process	221	24	44	N.S	260
regulation of biosynthetic process	220	27	39	N.S	267
regulation of cellular biosynthetic process	218	27	38	N.S	268
regulation of RNA metabolic process	216	26	33	N.S	276
regulation of RNA biosynthetic process	215	26	33	N.S	278
regulation of transcription, DNA-dependent	215	26	33	N.S	277
regulation of nucleobase-containing compound metabolic process	214	23	39	N.S	264
regulation of nitrogen compound metabolic process	214	23	39	N.S	264
cellular metabolic process	254	47	N.S	N.S	53	2
cellular macromolecule metabolic process	186	46	N.S	N.S	58
nitrogen compound metabolic process	174	46	N.S	N.S	82
cellular nitrogen compound metabolic process	169	48	N.S	N.S	88
organic cyclic compound metabolic process	169	46	N.S	N.S	87
heterocycle metabolic process	166	47	N.S	N.S	89
nucleobase-containing compound metabolic process	163	48	N.S	N.S	93
cellular aromatic compound metabolic process	163	47	N.S	N.S	89
nucleic acid metabolic process	139	47	N.S	N.S	100
cellular biosynthetic process	125	28	N.S	N.S	87
RNA metabolic process	112	25	N.S	N.S	113
gene expression	110	36	N.S	N.S	99
cellular nitrogen compound biosynthetic process	106	24	N.S	N.S	127
cellular macromolecule biosynthetic process	104	27	N.S	N.S	97
macromolecule biosynthetic process	102	26	N.S	N.S	96
nucleobase-containing compound biosynthetic process	100	22	N.S	N.S	132
regulation of metabolic process	231	N.S	55	N.S	253	3
developmental process	206	N.S	47	N.S	179
multicellular organismal development	198	N.S	41	N.S	188
anatomical structure development	177	N.S	42	N.S	133
single-organism developmental process	166	N.S	43	N.S	122
negative regulation of cellular process	70	N.S	22	N.S	33
negative regulation of biological process	69	N.S	23	N.S	32
negative regulation of macromolecule metabolic process	41	N.S	13	N.S	28
tissue morphogenesis	30	N.S	17	N.S	21
regulation of lipid biosynthetic process	11	N.S	16	N.S	N.S	4
regulation of lipid metabolic process	10	N.S	12	N.S	N.S
regulation of retinoic acid biosynthetic process	9	N.S	10	N.S	N.S
regulation of hormone metabolic process	8	N.S	10	N.S	N.S
regulation of cellular ketone metabolic process	7	N.S	9	N.S	N.S
single-multicellular organism process	187	N.S	N.S	N.S	180	5
multicellular organismal process	186	N.S	N.S	N.S	179
system development	138	N.S	N.S	N.S	125
biosynthetic process	127	N.S	N.S	N.S	85
organic substance biosynthetic process	125	N.S	N.S	N.S	85
organ development	121	N.S	N.S	N.S	102
organic cyclic compound biosynthetic process	106	N.S	N.S	N.S	125
aromatic compound biosynthetic process	105	N.S	N.S	N.S	128
heterocycle biosynthetic process	103	N.S	N.S	N.S	128
transcription, DNA-dependent	96	N.S	N.S	N.S	136
RNA biosynthetic process	95	N.S	N.S	N.S	136
embryo development	86	N.S	N.S	N.S	71
nervous system development	82	N.S	N.S	N.S	98
central nervous system development	82	N.S	N.S	N.S	96
anatomical structure morphogenesis	81	N.S	N.S	N.S	77
brain development	71	N.S	N.S	N.S	69
pattern specification process	64	N.S	N.S	N.S	53
cellular developmental process	63	N.S	N.S	N.S	48
cell differentiation	58	N.S	N.S	N.S	51
tissue development	58	N.S	N.S	N.S	45
embryonic morphogenesis	48	N.S	N.S	N.S	61
negative regulation of cellular macromolecule biosynthetic process	43	N.S	N.S	N.S	31
negative regulation of gene expression	42	N.S	N.S	N.S	33
negative regulation of macromolecule biosynthetic process	42	N.S	N.S	N.S	31
negative regulation of transcription, DNA-dependent	40	N.S	N.S	N.S	33
negative regulation of cellular biosynthetic process	40	N.S	N.S	N.S	30
negative regulation of biosynthetic process	40	N.S	N.S	N.S	30
sensory organ development	39	N.S	N.S	N.S	55
negative regulation of RNA metabolic process	39	N.S	N.S	N.S	33
negative regulation of metabolic process	39	N.S	N.S	N.S	27
hindbrain development	38	N.S	N.S	N.S	29
negative regulation of cellular metabolic process	37	N.S	N.S	N.S	26
eye development	35	N.S	N.S	N.S	53
negative regulation of nucleobase-containing compound metabolic process	35	N.S	N.S	N.S	30
organ morphogenesis	34	N.S	N.S	N.S	49
epithelium development	34	N.S	N.S	N.S	37
regionalization	33	N.S	N.S	N.S	30
chordate embryonic development	32	N.S	N.S	N.S	34
cardiovascular system development	32	N.S	N.S	N.S	16
embryonic organ development	31	N.S	N.S	N.S	42
embryo development ending in birth or egg hatching	31	N.S	N.S	N.S	34
heart development	29	N.S	N.S	N.S	15
regulation of transcription from RNA polymerase II promoter	25	N.S	N.S	N.S	33
morphogenesis of an epithelium	25	N.S	N.S	N.S	21
embryonic eye morphogenesis	20	N.S	N.S	N.S	35
heart morphogenesis	17	N.S	N.S	N.S	22
enzyme linked receptor protein signaling pathway	17	N.S	N.S	N.S	11
negative regulation of transcription from RNA polymerase II promoter	16	N.S	N.S	N.S	33
regulation of cellular response to growth factor stimulus	16	N.S	N.S	N.S	14
negative regulation of cell death	15	N.S	N.S	N.S	10
embryonic camera-type eye development	14	N.S	N.S	N.S	21
gland development	14	N.S	N.S	N.S	17
transmembrane receptor protein tyrosine kinase signaling pathway	14	N.S	N.S	N.S	11
embryonic camera-type eye morphogenesis	13	N.S	N.S	N.S	20
negative regulation of cellular response to growth factor stimulus	8	N.S	N.S	N.S	8
kidney epithelium development	6	N.S	N.S	N.S	6
cellular component organization	64	N.S	N.S	N.S	N.S	6
determination of bilateral symmetry	28	N.S	N.S	N.S	N.S
determination of left/right symmetry	23	N.S	N.S	N.S	N.S
hexose metabolic process	20	N.S	N.S	N.S	N.S
hexose catabolic process	20	N.S	N.S	N.S	N.S
regulation of cell death	20	N.S	N.S	N.S	N.S
monosaccharide metabolic process	20	N.S	N.S	N.S	N.S
regulation of programmed cell death	19	N.S	N.S	N.S	N.S
glucose catabolic process	18	N.S	N.S	N.S	N.S
single-organism carbohydrate catabolic process	18	N.S	N.S	N.S	N.S
glucose metabolic process	17	N.S	N.S	N.S	N.S
carbohydrate catabolic process	17	N.S	N.S	N.S	N.S
regulation of fibroblast growth factor receptor signaling pathway	15	N.S	N.S	N.S	N.S
mesoderm development	13	N.S	N.S	N.S	N.S
glycolysis	13	N.S	N.S	N.S	N.S
fibroblast growth factor receptor signaling pathway	8	N.S	N.S	N.S	N.S
regulation of transforming growth factor beta receptor signaling pathway	8	N.S	N.S	N.S	N.S
fertilization	8	N.S	N.S	N.S	N.S
glomerular visceral epithelial cell development	5	N.S	N.S	N.S	N.S
chromatin assembly	N.S	46	N.S	N.S	N.S	7
chromatin assembly or disassembly	N.S	44	N.S	N.S	N.S
chromatin organization	N.S	44	N.S	N.S	N.S
chromosome organization	N.S	44	N.S	N.S	N.S
DNA packaging	N.S	42	N.S	N.S	N.S
nucleosome assembly	N.S	42	N.S	N.S	N.S
DNA conformation change	N.S	40	N.S	N.S	N.S
nucleosome organization	N.S	40	N.S	N.S	N.S
protein-DNA complex assembly	N.S	40	N.S	N.S	N.S
protein-DNA complex subunit organization	N.S	38	N.S	N.S	N.S
organelle organization	N.S	33	N.S	N.S	N.S
cellular macromolecular complex assembly	N.S	25	N.S	N.S	N.S
DNA metabolic process	N.S	23	N.S	N.S	N.S
protein complex assembly	N.S	21	N.S	N.S	N.S
protein complex biogenesis	N.S	21	N.S	N.S	N.S
polyamine biosynthetic process	N.S	11	N.S	N.S	N.S
protein localization to kinetochore	N.S	8	N.S	N.S	N.S
regulation of biological process	N.S	N.S	N.S	N.S	216	8
biological regulation	N.S	N.S	N.S	N.S	214
regulation of cellular process	N.S	N.S	N.S	N.S	213
single-organism process	N.S	N.S	N.S	N.S	138
macromolecule metabolic process	N.S	N.S	N.S	N.S	51
camera-type eye development	N.S	N.S	N.S	N.S	48
embryonic organ morphogenesis	N.S	N.S	N.S	N.S	44
eye morphogenesis	N.S	N.S	N.S	N.S	31
anterior/posterior pattern specification	N.S	N.S	N.S	N.S	27
ventral spinal cord interneuron differentiation	N.S	N.S	N.S	N.S	25
generation of neurons	N.S	N.S	N.S	N.S	25
transcription from RNA polymerase II promoter	N.S	N.S	N.S	N.S	24
anatomical structure formation involved in morphogenesis	N.S	N.S	N.S	N.S	24
neurogenesis	N.S	N.S	N.S	N.S	23
tube development	N.S	N.S	N.S	N.S	23
spinal cord development	N.S	N.S	N.S	N.S	23
endocrine system development	N.S	N.S	N.S	N.S	22
camera-type eye morphogenesis	N.S	N.S	N.S	N.S	21
striated muscle tissue development	N.S	N.S	N.S	N.S	20
neuron differentiation	N.S	N.S	N.S	N.S	18
central nervous system neuron differentiation	N.S	N.S	N.S	N.S	18
ventral spinal cord development	N.S	N.S	N.S	N.S	18
positive regulation of cellular process	N.S	N.S	N.S	N.S	18
cardiac muscle cell differentiation	N.S	N.S	N.S	N.S	17
cardiac muscle tissue development	N.S	N.S	N.S	N.S	17
cell differentiation in spinal cord	N.S	N.S	N.S	N.S	15
cell development	N.S	N.S	N.S	N.S	15
positive regulation of transcription, DNA-dependent	N.S	N.S	N.S	N.S	14
tube morphogenesis	N.S	N.S	N.S	N.S	14
regulation of multicellular organismal process	N.S	N.S	N.S	N.S	14
retina development in camera-type eye	N.S	N.S	N.S	N.S	14
positive regulation of transcription from RNA polymerase II promoter	N.S	N.S	N.S	N.S	14
positive regulation of macromolecule biosynthetic process	N.S	N.S	N.S	N.S	14
cardiocyte differentiation	N.S	N.S	N.S	N.S	14
ventricular system development	N.S	N.S	N.S	N.S	14
positive regulation of RNA metabolic process	N.S	N.S	N.S	N.S	14
forebrain development	N.S	N.S	N.S	N.S	14
positive regulation of gene expression	N.S	N.S	N.S	N.S	13
pancreas development	N.S	N.S	N.S	N.S	13
pharyngeal muscle development	N.S	N.S	N.S	N.S	13
positive regulation of cellular biosynthetic process	N.S	N.S	N.S	N.S	13
epithelial tube morphogenesis	N.S	N.S	N.S	N.S	13
positive regulation of nucleobase-containing compound metabolic process	N.S	N.S	N.S	N.S	13
positive regulation of nitrogen compound metabolic process	N.S	N.S	N.S	N.S	13
heart looping	N.S	N.S	N.S	N.S	13
pharynx development	N.S	N.S	N.S	N.S	12
embryonic heart tube development	N.S	N.S	N.S	N.S	12
diencephalon development	N.S	N.S	N.S	N.S	12
regulation of sequence-specific DNA binding transcription factor activity	N.S	N.S	N.S	N.S	12
embryonic heart tube morphogenesis	N.S	N.S	N.S	N.S	11
somitogenesis	N.S	N.S	N.S	N.S	11
midbrain development	N.S	N.S	N.S	N.S	11
determination of heart left/right asymmetry	N.S	N.S	N.S	N.S	11
negative regulation of apoptotic process	N.S	N.S	N.S	N.S	11
kidney development	N.S	N.S	N.S	N.S	11
renal system development	N.S	N.S	N.S	N.S	11
negative regulation of programmed cell death	N.S	N.S	N.S	N.S	11
cellular response to endogenous stimulus	N.S	N.S	N.S	N.S	11
somite development	N.S	N.S	N.S	N.S	11
urogenital system development	N.S	N.S	N.S	N.S	11
foregut morphogenesis	N.S	N.S	N.S	N.S	10
segmentation	N.S	N.S	N.S	N.S	10
embryonic viscerocranium morphogenesis	N.S	N.S	N.S	N.S	10
cardiac muscle cell proliferation	N.S	N.S	N.S	N.S	10
embryonic cranial skeleton morphogenesis	N.S	N.S	N.S	N.S	10
neural tube development	N.S	N.S	N.S	N.S	10
ephrin receptor signaling pathway	N.S	N.S	N.S	N.S	10
muscle cell proliferation	N.S	N.S	N.S	N.S	10
response to endogenous stimulus	N.S	N.S	N.S	N.S	10
closure of optic fissure	N.S	N.S	N.S	N.S	10
embryonic skeletal system morphogenesis	N.S	N.S	N.S	N.S	10
regulation of apoptotic process	N.S	N.S	N.S	N.S	10
cellular response to organic cyclic compound	N.S	N.S	N.S	N.S	9
cellular response to hormone stimulus	N.S	N.S	N.S	N.S	9
epithelial cell differentiation	N.S	N.S	N.S	N.S	9
growth	N.S	N.S	N.S	N.S	9
organ growth	N.S	N.S	N.S	N.S	9
regulation of transmembrane receptor protein serine/threonine kinase signaling pathway	N.S	N.S	N.S	N.S	9
response to hormone stimulus	N.S	N.S	N.S	N.S	9
embryonic camera-type eye formation	N.S	N.S	N.S	N.S	9
formation of anatomical boundary	N.S	N.S	N.S	N.S	9
response to organic cyclic compound	N.S	N.S	N.S	N.S	8
pronephros development	N.S	N.S	N.S	N.S	8
determination of left/right asymmetry in diencephalon	N.S	N.S	N.S	N.S	8
cell fate commitment	N.S	N.S	N.S	N.S	8
cell proliferation	N.S	N.S	N.S	N.S	8
morphogenesis of embryonic epithelium	N.S	N.S	N.S	N.S	8
extraocular skeletal muscle development	N.S	N.S	N.S	N.S	7
rhombomere development	N.S	N.S	N.S	N.S	7
artery morphogenesis	N.S	N.S	N.S	N.S	7
epithelial cell development	N.S	N.S	N.S	N.S	6
aorta development	N.S	N.S	N.S	N.S	6
regulation of organ growth	N.S	N.S	N.S	N.S	6
fructose 6-phosphate metabolic process	N.S	N.S	N.S	N.S	6
regulation of vascular permeability	N.S	N.S	N.S	N.S	6
thalamus development	N.S	N.S	N.S	N.S	5
