# Supplementary material for: TALE factors use two distinct functional modes to control an essential zebrafish gene expression program
Source: eLife. 2018 Jun 18;7:e36144. doi: 10.7554/eLife.36144 (PMC6023610; doi:10.7554/eLife.36144)
Supplement: Supplementary file 3. — Related to Figures 1, 2 and 6, Figure 4—figure supplement 2 and Figure 5—figure supplement 1. Figures 1D, 2E and 6C, Figure 4—figure supplement 2C and Figure 5—figure supplement 1D show only a representative set of GO-terms for each analysis. This table lists all GO-terms identified by each GREAT or DAVID analysis in this study. Details of each analysis can be found in the first tab of the table. [file elife-36144-supp3.xlsx]

## Sheet: Legend
	Supplementary File 3. GO-term enrichment analysis. Related to Figures 1, 2, 6, Figure 4 - figure supplement 2 and Figure 5 - figure supplement 1.
	Figures 1D, 2E, 6C, Figure 4 - figure supplement 2C and Figure 5 - figure supplement 1D show only a representative set of GO-terms for each analysis. This table lists all GO-terms identified by each GREAT or DAVID analysis in this study. Details of each analysis can be found in the first tab of the table.
Sheet	Description	Related to
1	DAVID analysis of 12hpf TALE KD genes (n=526) identified by RNA-seq (p-adj ≤0.01, fold-change -1.5)	Figure 1D
2	GREAT analysis (single nearest gene 5 or 30kb mode) on Prep 3.5hpf and 12hpf-only bound sites	Figure 2E
3	DAVID analysis of 12hpf TALE KD genes near class3 or 4 MPADs	Figure 6C
4	DAVID analysis of genes found near Prep bound sites in 3.5hpf zebrafish and mESCs	Figure 4 - figure supplement 2C
5	GREAT analysis (single nearest gene 30kb mode) of K27ac FC class1 non-MPADs	Figure 5 - figure supplement 1D

## Sheet: 1-Related to Fig. 1D
Term	Count	%	P-Value	Benjamini	(-)log2 Benjamini FDR
multicellular organism development	195	39.7	2.5e-34	6e-31	100.395
single-multicellular organism process	202	41.1	8.6e-34	1.1e-30	99.5203
anatomical structure development	205	41.8	1.3e-33	1e-30	99.6578
developmental process	206	42	2.1e-33	1.3e-30	99.2793
single-organism developmental process	203	41.3	5.7e-33	2.8e-30	98.1724
multicellular organismal process	207	42.2	7e-29	2.8e-26	84.8847
system development	164	33.4	6.4e-27	2.2e-24	78.5888
animal organ development	132	26.9	1.1e-25	3.4e-23	74.6388
regulation of transcription, DNA-templated	114	23.2	5.6e-21	1.5e-18	59.2097
regulation of nucleic acid-templated transcription	114	23.2	6.1e-21	1.5e-18	59.2097
regulation of RNA biosynthetic process	114	23.2	6.7e-21	1.5e-18	59.2097
regulation of RNA metabolic process	115	23.4	1.3e-20	2.7e-18	58.3617
regulation of nucleobase-containing compound metabolic process	117	23.8	2.8e-20	5.3e-18	57.3887
cell differentiation	111	22.6	3.9e-20	6.9e-18	57.0081
regulation of gene expression	120	24.4	6e-19	9.8e-17	53.18
aromatic compound biosynthetic process	125	25.5	8.3e-19	1.3e-16	52.7723
nucleic acid-templated transcription	114	23.2	9e-19	1.3e-16	52.7723
heterocycle biosynthetic process	125	25.5	9.6e-19	1.3e-16	52.7723
nucleobase-containing compound biosynthetic process	123	25.1	9.9e-19	1.3e-16	52.7723
RNA biosynthetic process	114	23.2	1.1e-18	1.4e-16	52.6654
cellular developmental process	115	23.4	3.5e-18	4.1e-16	51.1152
regulation of cellular biosynthetic process	118	24	5.2e-18	5.8e-16	50.6148
regulation of nitrogen compound metabolic process	119	24.2	5.4e-18	5.7e-16	50.6399
organic cyclic compound biosynthetic process	125	25.5	6.8e-18	6.9e-16	50.3643
regulation of biosynthetic process	118	24	8.2e-18	8e-16	50.1508
regulation of cellular macromolecule biosynthetic process	115	23.4	1.4e-17	1.3e-15	49.4504
regulation of metabolic process	136	27.7	1.8e-17	1.7e-15	49.0634
regulation of macromolecule biosynthetic process	115	23.4	2.5e-17	2.2e-15	48.6914
regulation of macromolecule metabolic process	132	26.9	4.3e-17	3.6e-15	47.9809
regulation of primary metabolic process	132	26.9	5.8e-17	9e-15	46.659
regulation of cellular metabolic process	131	26.7	2.3e-16	1.7e-14	45.7415
nervous system development	88	17.9	4.2e-16	3.4e-14	44.7415
tissue development	80	16.3	7.3e-15	5.4e-13	40.7521
cellular aromatic compound metabolic process	151	30.8	2.3e-14	1.6e-12	39.1851
heterocycle metabolic process	149	30.3	6.7e-14	4.7e-12	37.6305
RNA metabolic process	124	25.3	7.1e-14	4.8e-12	37.6001
cellular nitrogen compound biosynthetic process	132	26.9	9.3e-14	6.1e-12	37.2543
nucleobase-containing compound metabolic process	145	29.5	2.8e-13	1.8e-11	35.6932
organic cyclic compound metabolic process	150	30.5	3.5e-13	2.2e-11	35.4037
anatomical structure morphogenesis	101	20.6	4.7e-13	2.9e-11	35.0052
nucleic acid metabolic process	131	26.7	1.1e-12	6.8e-11	33.7757
gene expression	134	27.3	3.3e-12	1.9e-10	32.2933
biosynthetic process	152	31	7.2e-12	4.1e-10	31.1837
organic substance biosynthetic process	149	30.3	7.9e-12	4.4e-10	31.0818
cellular macromolecule biosynthetic process	129	26.3	8.1e-12	4.4e-10	31.0818
nitrogen compound metabolic process	166	33.8	1.3e-11	6.9e-10	30.4327
macromolecule biosynthetic process	129	26.3	1.5e-11	7.6e-10	30.2933
cellular biosynthetic process	146	29.7	2e-11	1e-09	29.8974
transcription, DNA-templated	80	16.3	2.4e-11	1.2e-09	29.6343
cellular nitrogen compound metabolic process	158	32.2	3.3e-11	1.6e-09	29.2193
embryo development	63	12.8	9.6e-11	4.6e-09	27.6957
embryonic organ development	41	8.4	1.5e-10	7.2e-09	27.0494
cell development	65	13.2	1.5e-09	6.7e-08	23.8313
neurogenesis	54	11	3.5e-09	1.6e-07	22.5754
central nervous system development	41	8.4	1.5e-08	6.7e-07	20.5093
cell fate commitment	19	3.9	1.7e-08	7.2e-07	20.4055
organic substance metabolic process	240	48.9	6.6e-08	2.8e-06	18.4461
metabolic process	256	52.1	1e-07	4.3e-06	17.8272
organ morphogenesis	41	8.4	1.9e-07	7.8e-06	16.9681
epithelium development	43	8.8	4.8e-07	2e-05	15.6096
cellular metabolic process	223	45.4	5e-07	2e-05	15.6096
generation of neurons	46	9.4	5.3e-07	2.1e-05	15.5393
primary metabolic process	227	46.2	7.6e-07	2.9e-05	15.0736
embryonic morphogenesis	39	7.9	1.2e-06	4.7e-05	14.377
muscle cell development	17	3.5	2.1e-06	8e-05	13.6096
brain development	30	6.1	2.5e-06	9e-05	13.4397
skeletal muscle organ development	14	2.9	2.5e-06	9e-05	13.4397
muscle structure development	24	4.9	2.5e-06	9e-05	13.4397
sensory organ development	33	6.7	2.6e-06	9e-05	13.4397
striated muscle cell development	16	3.3	3.3e-06	0.00012	13.0247
muscle fiber development	11	2.2	4.8e-06	0.00016	12.6096
macromolecule metabolic process	197	40.1	5.1e-06	0.00017	12.5222
tube development	27	5.5	5.3e-06	0.00018	12.4397
muscle tissue development	17	3.5	5.7e-06	0.00019	12.3617
single-organism process	309	62.9	7.1e-06	0.00023	12.0861
head development	30	6.1	7.3e-06	0.00023	12.0861
cellular macromolecule metabolic process	181	36.9	7.5e-06	0.00024	12.0247
epithelial cell differentiation	16	3.3	7.8e-06	0.00024	12.0247
skeletal muscle fiber development	9	1.8	7.9e-06	0.00024	12.0247
myotube cell development	9	1.8	7.9e-06	0.00024	12.0247
muscle organ development	16	3.3	8.4e-06	0.00026	11.9092
biological regulation	228	46.4	9.1e-06	0.00027	11.8548
epithelial cell fate commitment	6	1.2	1.2e-05	0.00035	11.4804
striated muscle cell differentiation	17	3.5	1.3e-05	0.00038	11.3617
regulation of biological process	214	43.6	1.6e-05	0.00045	11.1178
striated muscle tissue development	16	3.3	2.1e-05	0.0006	10.7027
neuron fate commitment	8	1.6	2.5e-05	0.0007	10.4804
skeletal muscle tissue development	12	2.4	2.5e-05	0.0007	10.4804
muscle cell differentiation	18	3.7	2.8e-05	0.00077	10.3429
regulation of cellular process	206	42	2.9e-05	0.0008	10.2877
neuron differentiation	39	7.9	3e-05	0.0008	10.2877
sensory organ morphogenesis	20	4.1	3.6e-05	0.00097	10.0097
artery development	8	1.6	3.6e-05	0.00096	10.0247
circulatory system development	41	8.4	5.1e-05	0.0013	9.58727
cardiovascular system development	41	8.4	5.1e-05	0.0013	9.58727
regulation of cell development	19	3.9	5.6e-05	0.0015	9.38082
tissue morphogenesis	29	5.9	7.1e-05	0.0018	9.11779
regulation of multicellular organismal process	36	7.3	7.2e-05	0.0018	9.11779
skeletal system development	20	4.1	7.8e-05	0.0019	9.03978
regulation of cell differentiation	24	4.9	0.0001	0.0026	8.58727
myotube differentiation	9	1.8	0.00014	0.0034	8.20025
vasculogenesis	8	1.6	0.00015	0.0038	8.03978
regulation of neurogenesis	17	3.5	0.00018	0.0043	7.86145
locomotion	37	7.5	0.00019	0.0045	7.79586
cell proliferation	18	3.7	0.00022	0.0052	7.58727
regulation of multicellular organismal development	28	5.7	0.00023	0.0054	7.53282
camera-type eye photoreceptor cell differentiation	6	1.2	0.00025	0.0057	7.45482
tube morphogenesis	17	3.5	0.00025	0.0058	7.42973
epidermal cell differentiation	8	1.6	0.00026	0.006	7.38082
blood vessel development	23	4.7	0.00027	0.006	7.38082
blood vessel morphogenesis	21	4.3	0.00035	0.0079	6.98393
vasculature development	25	5.1	0.0004	0.0089	6.81198
embryonic organ morphogenesis	22	4.5	0.00041	0.0089	6.81198
cell motility	30	6.1	0.00041	0.0088	6.82828
localization of cell	30	6.1	0.00041	0.0088	6.82828
regulation of nervous system development	17	3.5	0.00043	0.0093	6.74855
negative regulation of nucleic acid-templated transcription	18	3.7	0.00045	0.0096	6.70275
negative regulation of transcription, DNA-templated	18	3.7	0.00045	0.0096	6.70275
negative regulation of RNA biosynthetic process	18	3.7	0.00045	0.0096	6.70275
morphogenesis of an epithelium	24	4.9	0.00051	0.011	6.50635
mesenchyme development	15	3.1	0.00056	0.012	6.38082
negative regulation of RNA metabolic process	18	3.7	0.00061	0.013	6.26534
rhombomere morphogenesis	5	1	0.00077	0.016	5.96578
anatomical structure formation involved in morphogenesis	38	7.7	0.0008	0.016	5.96578
eye development	21	4.3	0.0008	0.016	5.96578
cell migration	27	5.5	0.00088	0.017	5.87832
retina morphogenesis in camera-type eye	10	2	0.00098	0.019	5.71786
cell fate specification	9	1.8	0.001	0.02	5.64386
epidermis development	8	1.6	0.0011	0.021	5.57347
rhombomere development	5	1	0.0012	0.023	5.44222
ameboidal-type cell migration	15	3.1	0.0013	0.024	5.38082
connective tissue development	11	2.2	0.0015	0.028	5.15843
forebrain development	11	2.2	0.0015	0.028	5.15843
embryonic hemopoiesis	8	1.6	0.0016	0.03	5.05889
spinal cord development	8	1.6	0.0016	0.03	5.05889
autonomic nervous system development	6	1.2	0.0019	0.034	4.87832
negative regulation of nucleobase-containing compound metabolic process	18	3.7	0.0019	0.034	4.87832
movement of cell or subcellular component	37	7.5	0.002	0.036	4.79586
definitive hemopoiesis	6	1.2	0.0024	0.043	4.53952
hindbrain development	10	2	0.0025	0.044	4.50635
hair cell differentiation	6	1.2	0.0027	0.048	4.38082

## Sheet: 2-Related to Fig. 2E
3.5hpf Prep1 bound sites						12hpflate Prep1 bound sites
GREAT mode	Ontology	# Term Name	Binom FDR Q-Val	(-)log2 Binom FDR		GREAT mode	Ontology	# Term Name	Binom FDR Q-Val	(-)log2 Binom FDR
single nearest gene within 5kb	GO Biological Process	regulation of metabolic process	5.41e-54	176.948		single nearest gene within 5kb	GO Biological Process	cellular process	1.28e-126	418.207
		regulation of cellular metabolic process	9.0872e-54	176.2				single-organism process	7.5122e-117	385.756
		regulation of primary metabolic process	2.83475e-51	167.915				biological regulation	1.27443e-104	345.131
		regulation of macromolecule metabolic process	2.65407e-51	168.01				developmental process	6.61291e-104	342.755
		regulation of macromolecule biosynthetic process	3.16232e-51	167.757				multicellular organismal development	6.00823e-103	339.572
		regulation of gene expression	5.18105e-51	167.045				regulation of cellular process	1.21258e-102	338.559
		regulation of cellular macromolecule biosynthetic process	9.95033e-51	166.104				regulation of biological process	1.93385e-101	334.563
		regulation of biosynthetic process	9.61997e-51	166.152				regulation of nitrogen compound metabolic process	2.8738e-99	327.348
		regulation of nitrogen compound metabolic process	1.50451e-50	165.507				regulation of nucleobase-containing compound metabolic process	6.2095e-99	326.236
		regulation of nucleobase-containing compound metabolic process	2.79663e-50	164.613				regulation of cellular metabolic process	3.30146e-97	320.504
		regulation of cellular biosynthetic process	7.72838e-50	163.146				regulation of RNA metabolic process	7.80744e-97	319.262
		regulation of transcription, DNA-dependent	1.08535e-49	162.656				regulation of primary metabolic process	9.88932e-97	318.921
		regulation of RNA biosynthetic process	1.43953e-49	162.249				regulation of gene expression	7.61047e-96	315.977
		regulation of RNA metabolic process	4.68328e-49	160.547				regulation of metabolic process	2.30067e-95	314.381
		developmental process	2.69452e-46	151.379				regulation of macromolecule biosynthetic process	3.31225e-95	313.855
		multicellular organismal development	6.62038e-46	150.082				regulation of cellular macromolecule biosynthetic process	4.28015e-95	313.486
		single-multicellular organism process	1.95519e-42	138.554				regulation of RNA biosynthetic process	7.19204e-95	312.737
		multicellular organismal process	2.61776e-42	138.133				regulation of transcription, DNA-dependent	1.67396e-94	311.518
		anatomical structure development	2.41841e-41	134.925				single-multicellular organism process	2.66545e-94	310.847
		nitrogen compound metabolic process	8.1715e-38	123.203				multicellular organismal process	4.45955e-94	310.104
		single-organism developmental process	8.95468e-37	119.749				regulation of cellular biosynthetic process	3.34735e-93	307.196
		cellular nitrogen compound metabolic process	1.99209e-36	118.595				regulation of macromolecule metabolic process	8.90888e-93	305.784
		organic cyclic compound metabolic process	2.84904e-36	118.079				regulation of biosynthetic process	8.54448e-93	305.844
		heterocycle metabolic process	1.75644e-35	115.455				cellular metabolic process	1.32536e-86	285.279
		cellular aromatic compound metabolic process	2.34435e-35	115.038				single-organism cellular process	8.63569e-86	282.576
		nucleobase-containing compound metabolic process	2.35799e-35	115.03				anatomical structure development	4.79314e-85	280.103
		system development	6.57102e-35	113.551				single-organism developmental process	2.30525e-80	264.549
		nucleic acid metabolic process	4.7034e-31	100.746				metabolic process	2.5776e-78	257.744
		organ development	2.69036e-30	98.23				organic substance metabolic process	5.2908e-78	256.707
		organic substance biosynthetic process	3.36378e-30	97.9078				primary metabolic process	5.46685e-78	256.66
		biosynthetic process	3.82197e-30	97.7235				system development	2.29978e-76	251.265
		cellular biosynthetic process	6.89544e-29	93.5503				cellular macromolecule metabolic process	4.40042e-73	240.363
		gene expression	7.76172e-26	83.4138				macromolecule metabolic process	9.80453e-67	219.276
		cellular macromolecule biosynthetic process	1.34077e-25	82.6251				nitrogen compound metabolic process	7.66525e-64	209.665
		RNA metabolic process	1.39983e-25	82.563				organ development	3.48115e-62	204.16
		macromolecule biosynthetic process	1.41447e-25	82.5479				nucleobase-containing compound metabolic process	8.54732e-62	202.864
		cellular nitrogen compound biosynthetic process	2.75173e-24	78.2659				heterocycle metabolic process	3.32176e-60	197.584
		organic cyclic compound biosynthetic process	4.0297e-24	77.7156				cellular aromatic compound metabolic process	4.77804e-60	197.059
		aromatic compound biosynthetic process	6.57055e-24	77.0103				organic cyclic compound metabolic process	1.62773e-59	195.291
		heterocycle biosynthetic process	1.01604e-23	76.3814				cellular nitrogen compound metabolic process	2.96586e-59	194.425
		nucleobase-containing compound biosynthetic process	1.87904e-23	75.4944				transcription, DNA-dependent	3.04173e-59	194.389
		transcription, DNA-dependent	6.32181e-23	73.744				nucleobase-containing compound biosynthetic process	5.19824e-59	193.616
		RNA biosynthetic process	1.05292e-22	73.008				RNA biosynthetic process	6.96942e-59	193.193
		nervous system development	1.78307e-22	72.2481				aromatic compound biosynthetic process	1.10417e-57	189.207
		embryo development	2.76121e-18	58.3294				heterocycle biosynthetic process	2.49575e-57	188.03
		central nervous system development	1.96345e-16	52.1775				anatomical structure morphogenesis	7.52653e-57	186.438
		pattern specification process	1.69462e-15	49.068				RNA metabolic process	8.47723e-57	186.266
		negative regulation of biological process	2.61108e-15	48.4443				cellular nitrogen compound biosynthetic process	6.38703e-56	183.353
		negative regulation of cellular process	3.49117e-15	48.0252				nucleic acid metabolic process	7.14489e-56	183.191
		tissue development	2.36447e-14	45.2655				organic cyclic compound biosynthetic process	1.38293e-55	182.238
		brain development	2.44674e-14	45.2161				gene expression	1.85212e-55	181.817
		negative regulation of macromolecule metabolic process	1.78845e-08	25.7367				macromolecule biosynthetic process	1.66172e-52	172.008
		negative regulation of metabolic process	4.27617e-08	24.4791				organic substance biosynthetic process	5.13001e-52	170.381
		negative regulation of cellular macromolecule biosynthetic process	8.96066e-08	23.4118				cellular biosynthetic process	1.33931e-51	168.997
		negative regulation of gene expression	9.04119e-08	23.3989				cellular macromolecule biosynthetic process	3.85844e-51	167.47
		negative regulation of macromolecule biosynthetic process	1.2564e-07	22.9242				biosynthetic process	1.06706e-50	166.003
		negative regulation of cellular biosynthetic process	1.8074e-07	22.3996				nervous system development	2.33003e-49	161.554
		negative regulation of biosynthetic process	2.16229e-07	22.1409				cellular developmental process	2.59483e-49	161.399
		negative regulation of transcription, DNA-dependent	6.00722e-07	20.6668				cell differentiation	4.0823e-47	154.101
		muscle structure development	9.14481e-07	20.0605				embryo development	4.07505e-43	140.816
		negative regulation of RNA metabolic process	1.0071e-06	19.9214				tissue development	3.71565e-40	130.984
		muscle organ development	1.00656e-05	16.6002				pattern specification process	1.76897e-33	108.801
		regulation of lipid biosynthetic process	0.00163621	9.25543				cellular component organization	1.08039e-32	106.19
		regulation of retinoic acid biosynthetic process	0.00176369	9.14719				cellular component organization or biogenesis	1.31403e-31	102.586
		regulation of hormone metabolic process	0.00367274	8.08893				embryo development ending in birth or egg hatching	1.11637e-29	96.1771
								chordate embryonic development	2.29056e-29	95.1402
single nearest gene within 30kb	GO Biological Process	coenzyme A metabolic process	0.00114988	9.7643				central nervous system development	1.092e-28	92.887
		regulation of fibroblast growth factor receptor signaling pathway	0.012817	6.2858				neurogenesis	1.34725e-28	92.584
		skeletal myofibril assembly	0.0273109	5.19438				generation of neurons	1.80518e-28	92.1618
		negative regulation of cellular response to growth factor stimulus	0.0271845	5.20107				cell development	2.1428e-25	81.9487
		inner ear receptor cell differentiation	0.0425721	4.55395				embryonic morphogenesis	7.04926e-25	80.2307
								negative regulation of biological process	1.80106e-24	78.8774
	The test set of 13,181 genomic regions picked 5,325 genes (31%) of all 17,059 genes.							brain development	1.88695e-24	78.8102
								neuron differentiation	1.20117e-23	76.1399
								negative regulation of cellular process	8.482e-23	73.3199
								sensory organ development	1.17536e-22	72.8493
	GO Biological Process has 4,067 terms covering 11,218 (66%) of all 17,059 genes.	4,067 ontology terms were tested (100%) using an annotation count range of [1, Inf].						neuron development	5.21071e-22	70.7009
								organ morphogenesis	1.1639e-21	69.5415
								cellular component movement	1.22956e-21	69.4623
								cellular component morphogenesis	2.29936e-21	68.5593
	GO Biological Process has 4,067 terms covering 11,218 (66%) of all 17,059 genes.	4,067 ontology terms were tested (100%) using an annotation count range of [1, Inf].						cell morphogenesis	1.05824e-20	66.3569
								response to chemical stimulus	2.75089e-20	64.9787
								regionalization	3.02335e-20	64.8424
	GREAT version 3.0.0							regulation of signaling	3.39206e-20	64.6764
	Species assembly: danRer7							cell projection organization	9.43175e-20	63.201
	Association rule: Single nearest gene: 5000 or 30000 bp max extension, curated regulatory domains included							anatomical structure formation involved in morphogenesis	1.13953e-19	62.9282
								positive regulation of cellular process	1.12803e-19	62.9428
								regulation of cell communication	1.31227e-19	62.7246
								embryonic organ development	1.48452e-19	62.5466
								positive regulation of biological process	1.87897e-19	62.2067
								cardiovascular system development	2.23227e-19	61.9581
								regulation of signal transduction	4.05786e-19	61.0959
								enzyme linked receptor protein signaling pathway	3.61589e-18	57.9404
								cell projection morphogenesis	4.88043e-18	57.5077
								tissue morphogenesis	4.85194e-18	57.5161
								axon development	1.05798e-17	56.3915
								cell part morphogenesis	1.09235e-17	56.3453
								neuron projection development	1.11801e-17	56.3118
								regulation of response to stimulus	2.26899e-17	55.2907
								epithelium development	3.48414e-17	54.672
								cell morphogenesis involved in differentiation	4.00987e-17	54.4692
								neuron projection morphogenesis	9.19497e-17	53.2719
								axonogenesis	2.60775e-16	51.768
								cell morphogenesis involved in neuron differentiation	4.66669e-16	50.9284
								regulation of developmental process	1.34185e-15	49.4047
								positive regulation of macromolecule metabolic process	1.81129e-15	48.9719
								regulation of transcription from RNA polymerase II promoter	1.86824e-15	48.9272
								morphogenesis of an epithelium	4.11933e-15	47.7865
								embryonic organ morphogenesis	4.13947e-15	47.7795
								eye development	4.15521e-15	47.774
								cellular response to chemical stimulus	4.3719e-15	47.7007
								cellular response to organic substance	1.36242e-14	46.0608
								positive regulation of gene expression	1.35972e-14	46.0637
								locomotion	1.52114e-14	45.9018
								positive regulation of metabolic process	4.34599e-14	44.3873
								negative regulation of cellular macromolecule biosynthetic process	1.05732e-13	43.1047
								cellular catabolic process	1.14039e-13	42.9955
								response to organic substance	1.72744e-13	42.3964
								negative regulation of macromolecule biosynthetic process	1.75339e-13	42.3749
								negative regulation of cellular biosynthetic process	3.09124e-13	41.5569
								negative regulation of biosynthetic process	3.93407e-13	41.209
								positive regulation of RNA metabolic process	5.33177e-13	40.7705
								positive regulation of nucleobase-containing compound metabolic process	5.88758e-13	40.6274
								positive regulation of nitrogen compound metabolic process	7.44797e-13	40.2882
								determination of bilateral symmetry	8.39784e-13	40.115
								camera-type eye development	1.22505e-12	39.5703
								positive regulation of macromolecule biosynthetic process	1.31494e-12	39.4681
								cellular response to endogenous stimulus	1.54829e-12	39.2325
								regulation of multicellular organismal development	1.59825e-12	39.1866
								skeletal system development	2.04831e-12	38.8287
								transmembrane receptor protein tyrosine kinase signaling pathway	2.57281e-12	38.4998
								positive regulation of transcription, DNA-dependent	2.7802e-12	38.3879
								anterior/posterior pattern specification	3.19015e-12	38.1895
								negative regulation of transcription, DNA-dependent	4.3236e-12	37.7509
								positive regulation of cellular metabolic process	6.00193e-12	37.2777
								negative regulation of nucleobase-containing compound metabolic process	6.89208e-12	37.0782
								negative regulation of RNA metabolic process	8.91279e-12	36.7073
								cell migration	9.28689e-12	36.6479
								response to endogenous stimulus	1.16419e-11	36.3219
								tube development	1.34176e-11	36.1171
								positive regulation of cellular biosynthetic process	1.45161e-11	36.0036
								negative regulation of cellular metabolic process	1.7234e-11	35.756
								determination of left/right symmetry	2.93937e-11	34.9857
								cell motility	3.29153e-11	34.8225
								negative regulation of metabolic process	8.2629e-11	33.4946
								negative regulation of gene expression	9.1516e-11	33.3472
								negative regulation of macromolecule metabolic process	1.0466e-10	33.1536
								developmental growth	1.23731e-10	32.9121
								axon guidance	1.27443e-10	32.8694
								forebrain development	1.64144e-10	32.5043
								Notch signaling pathway	2.03656e-10	32.1931
								hindbrain development	2.18283e-10	32.0931
								growth	3.42007e-10	31.4453
								tube morphogenesis	4.33379e-10	31.1037
								regulation of cell differentiation	5.68209e-10	30.7129
								eye morphogenesis	5.68045e-10	30.7133
								epithelial tube morphogenesis	7.28041e-10	30.3553
								muscle structure development	1.18055e-09	29.6579
								camera-type eye morphogenesis	1.25732e-09	29.567
								stem cell differentiation	2.22248e-09	28.7452
								negative regulation of transcription from RNA polymerase II promoter	2.58341e-09	28.5281
								neural tube development	2.92678e-09	28.348
								skeletal system morphogenesis	3.1491e-09	28.2424
								retina development in camera-type eye	3.41777e-09	28.1243
								regulation of anatomical structure morphogenesis	4.6972e-09	27.6656
								midbrain development	5.96881e-09	27.3199
								inner ear development	6.44275e-09	27.2097
								ear development	7.99936e-09	26.8975
								Wnt receptor signaling pathway	8.26089e-09	26.8511
								negative regulation of response to stimulus	1.17131e-08	26.3473
								central nervous system neuron differentiation	2.1769e-08	25.4531
								regulation of nervous system development	2.17413e-08	25.455
								ephrin receptor signaling pathway	2.28005e-08	25.3864
								positive regulation of transcription from RNA polymerase II promoter	2.33583e-08	25.3515
								skeletal muscle organ development	2.44823e-08	25.2837
								embryonic skeletal system development	2.48786e-08	25.2605
								appendage development	2.74864e-08	25.1167
								negative regulation of signal transduction	3.72056e-08	24.6799
								negative regulation of cell communication	4.38199e-08	24.4438
								negative regulation of signaling	4.38199e-08	24.4438
								somitogenesis	6.61524e-08	23.8496
								ubiquitin-dependent protein catabolic process	7.39371e-08	23.6891
								somite development	8.17094e-08	23.5449
								modification-dependent protein catabolic process	1.01704e-07	23.2291
								regulation of cell development	1.2608e-07	22.9192
								pectoral fin development	1.37247e-07	22.7967
								cellular response to growth factor stimulus	1.49905e-07	22.6694
								dorsal/ventral pattern formation	1.95233e-07	22.2883
								protein catabolic process	1.95876e-07	22.2836
								response to growth factor stimulus	1.96516e-07	22.2788
								regulation of neurogenesis	2.21999e-07	22.1029
								skeletal muscle tissue development	2.28629e-07	22.0605
								regeneration	4.22589e-07	21.1742
								mesenchymal cell differentiation	4.34837e-07	21.133
								tissue regeneration	4.56119e-07	21.0641
								morphogenesis of embryonic epithelium	5.11955e-07	20.8975
								fin development	9.37189e-07	20.0252
								mesoderm development	9.83895e-07	19.955
								axis specification	1.01389e-06	19.9117
								regulation of cell proliferation	2.96226e-06	18.3649
								pancreas development	3.52784e-06	18.1128
								inner ear morphogenesis	3.77445e-06	18.0153
								regulation of Wnt receptor signaling pathway	3.99154e-06	17.9346
								regulation of cellular response to growth factor stimulus	4.61429e-06	17.7255
								ear morphogenesis	4.72299e-06	17.6919
								negative regulation of cell migration	6.03563e-06	17.3381
								regulation of sequence-specific DNA binding transcription factor activity	7.41019e-06	17.0421
								post-anal tail morphogenesis	7.73163e-06	16.9808
								otic vesicle development	8.57706e-06	16.8311
								cell growth	1.03826e-05	16.5555
								retinoic acid receptor signaling pathway	1.26192e-05	16.274
								regulation of cell motility	1.49379e-05	16.0307
								ectodermal placode development	1.72386e-05	15.824
								negative regulation of locomotion	1.7272e-05	15.8212
								negative regulation of Wnt receptor signaling pathway	3.27601e-05	14.8977
								regulation of cell migration	3.68802e-05	14.7268
								appendage morphogenesis	3.76909e-05	14.6954
								regulation of canonical Wnt receptor signaling pathway	4.25867e-05	14.5192
								otic vesicle morphogenesis	4.97857e-05	14.2939
								endocrine system development	5.10899e-05	14.2566
								embryonic camera-type eye development	6.24221e-05	13.9676
								canonical Wnt receptor signaling pathway	6.61178e-05	13.8846
								neuron migration	8.00327e-05	13.6091
								developmental growth involved in morphogenesis	8.55501e-05	13.5129
								forebrain neuron differentiation	8.78327e-05	13.4749
								ectodermal placode formation	0.000106604	13.1955
								embryonic appendage morphogenesis	0.000117614	13.0537
								negative regulation of canonical Wnt receptor signaling pathway	0.00019549	12.3206
								regulation of histone modification	0.000278812	11.8084
								embryonic camera-type eye morphogenesis	0.000281212	11.7961
								pectoral fin morphogenesis	0.000307341	11.6679
								embryonic pectoral fin morphogenesis	0.000313595	11.6388
								regulation of fibroblast growth factor receptor signaling pathway	0.000377851	11.3699
								embryonic eye morphogenesis	0.00048652	11.0052
								histone lysine methylation	0.000864469	10.1759
								histone H3-K36 methylation	0.00199326	8.97065
								peptidyl-lysine dimethylation	0.00200446	8.96257
								pronephric glomerulus development	0.00411494	7.92491
								negative regulation of cellular response to growth factor stimulus	0.00429538	7.863
								positive regulation of sequence-specific DNA binding transcription factor activity	0.00431443	7.85661
								hippo signaling cascade	0.00436	7.84146
								peptidyl-lysine monomethylation	0.00451152	7.79217
								regulation of transforming growth factor beta receptor signaling pathway	0.0051283	7.6073
								pronephric nephron development	0.0065302	7.25866
								regulation of catenin import into nucleus	0.012711	6.29778
						single nearest gene within 30kb	GO Biological Process	multicellular organismal development	5.08358e-134	442.793
								regulation of RNA metabolic process	5.00555e-117	386.342
								regulation of RNA biosynthetic process	1.30846e-116	384.956
								regulation of transcription, DNA-dependent	1.75137e-116	384.535
								regulation of nitrogen compound metabolic process	2.76786e-115	380.553
								regulation of nucleobase-containing compound metabolic process	3.21414e-115	380.337
								regulation of cellular macromolecule biosynthetic process	1.59474e-112	371.383
								regulation of macromolecule biosynthetic process	2.02639e-112	371.037
								regulation of gene expression	2.28292e-112	370.865
								regulation of cellular metabolic process	5.23548e-112	369.668
								regulation of primary metabolic process	1.78287e-110	364.578
								regulation of cellular biosynthetic process	1.62428e-109	361.39
								regulation of biosynthetic process	1.54347e-108	358.142
								regulation of macromolecule metabolic process	2.3396e-108	357.542
								regulation of metabolic process	2.2657e-107	354.266
								system development	2.09411e-103	341.092
								organ development	8.28384e-90	295.923
								anatomical structure morphogenesis	2.26026e-82	271.222
								nervous system development	5.4289e-78	256.67
								cellular developmental process	5.71849e-73	239.985
								cell differentiation	4.56472e-72	236.988
								embryo development	1.3966e-63	208.8
								tissue development	2.67211e-61	201.22
								transcription, DNA-dependent	6.39173e-61	199.961
								RNA biosynthetic process	2.62417e-60	197.924
								nucleobase-containing compound biosynthetic process	1.2296e-56	185.73
								aromatic compound biosynthetic process	5.34133e-55	180.289
								heterocycle biosynthetic process	5.22825e-55	180.32
								cellular nitrogen compound biosynthetic process	1.35644e-53	175.622
								central nervous system development	1.96519e-53	175.088
								neurogenesis	1.04793e-52	172.673
								organic cyclic compound biosynthetic process	2.07319e-52	171.688
								generation of neurons	1.28785e-49	162.41
								brain development	1.49773e-48	158.87
								pattern specification process	5.78767e-47	153.598
								embryo development ending in birth or egg hatching	1.45631e-45	148.944
								cell development	1.4896e-45	148.912
								chordate embryonic development	7.16063e-45	146.647
								embryonic morphogenesis	6.50923e-42	136.818
								neuron differentiation	5.9324e-39	126.987
								anatomical structure formation involved in morphogenesis	6.46116e-38	123.541
								cellular component morphogenesis	3.53428e-37	121.09
								cell morphogenesis	5.41107e-36	117.153
								organ morphogenesis	1.32484e-34	112.54
								hindbrain development	1.38869e-34	112.472
								neuron development	5.24554e-34	110.554
								epithelium development	5.38452e-34	110.517
								tissue morphogenesis	1.84554e-33	108.74
								cell projection organization	7.38461e-33	106.739
								sensory organ development	8.90592e-33	106.469
								axon development	1.72977e-32	105.511
								neuron projection development	2.42992e-32	105.021
								cell morphogenesis involved in differentiation	7.01071e-32	103.492
								regionalization	2.44204e-31	101.692
								cell morphogenesis involved in neuron differentiation	7.0453e-31	100.163
								neuron projection morphogenesis	4.82797e-30	97.3864
								cellular component movement	7.00579e-30	96.8493
								axonogenesis	9.92363e-30	96.347
								cell projection morphogenesis	1.03441e-29	96.2871
								embryonic organ development	2.31611e-29	95.1242
								morphogenesis of an epithelium	5.83548e-29	93.7911
								cell part morphogenesis	6.66408e-29	93.5995
								locomotion	8.63857e-27	86.5813
								embryonic organ morphogenesis	8.99552e-26	83.2009
								stem cell differentiation	3.26466e-25	81.3413
								cell migration	1.07459e-23	76.3006
								tube development	2.25366e-23	75.2321
								regulation of developmental process	9.1516e-23	73.2103
								cell motility	4.48983e-22	70.9158
								eye development	6.88274e-22	70.2994
								camera-type eye development	3.91873e-21	67.7901
								skeletal system development	7.56872e-21	66.8404
								regulation of cell differentiation	1.32781e-20	66.0295
								regulation of multicellular organismal development	6.93819e-20	63.644
								regulation of cellular response to growth factor stimulus	2.50164e-19	61.7938
								anterior/posterior pattern specification	6.00978e-19	60.5293
								axon guidance	6.00667e-19	60.5301
								inner ear development	6.25572e-18	57.1495
								neural tube development	7.2532e-18	56.9361
								forebrain development	1.27706e-17	56.12
								heart development	1.32307e-17	56.0689
								ear development	1.39361e-17	55.994
								Notch signaling pathway	5.78307e-17	53.9409
								tube morphogenesis	1.33302e-16	52.7362
								developmental growth	3.21659e-16	51.4653
								midbrain development	3.37721e-16	51.395
								determination of bilateral symmetry	4.34106e-16	51.0328
								Wnt receptor signaling pathway	5.68945e-16	50.6426
								stem cell development	9.62997e-16	49.8833
								regulation of cell development	9.61577e-16	49.8854
								skeletal system morphogenesis	9.78245e-16	49.8607
								eye morphogenesis	1.08651e-15	49.7092
								camera-type eye morphogenesis	1.14323e-15	49.6358
								regulation of neurogenesis	1.18379e-15	49.5855
								regulation of nervous system development	1.31864e-15	49.4299
								muscle structure development	2.23561e-15	48.6683
								epithelial tube morphogenesis	3.21035e-15	48.1462
								determination of left/right symmetry	3.20763e-15	48.1474
								cell fate commitment	4.74566e-15	47.5823
								pancreas development	8.59848e-15	46.7248
								liver development	8.69726e-15	46.7084
								growth	8.8097e-15	46.6898
								hepaticobiliary system development	1.74805e-14	45.7012
								pectoral fin development	2.06934e-14	45.4578
								neuron migration	2.54893e-14	45.1571
								retina development in camera-type eye	2.57908e-14	45.1401
								mesoderm development	3.67978e-14	44.6274
								mesenchymal cell differentiation	3.77061e-14	44.5922
								rhombomere development	5.22947e-14	44.1203
								cellular response to organic substance	5.26011e-14	44.1119
								kidney development	6.50661e-14	43.8051
								appendage development	9.68504e-14	43.2312
								chemotaxis	1.47194e-13	42.6273
								urogenital system development	1.54995e-13	42.5528
								inner ear morphogenesis	1.57074e-13	42.5336
								renal system development	1.58769e-13	42.5181
								taxis	2.42873e-13	41.9049
								retinoic acid receptor signaling pathway	2.71982e-13	41.7416
								negative regulation of cellular macromolecule biosynthetic process	2.95984e-13	41.6195
								regulation of fibroblast growth factor receptor signaling pathway	3.69648e-13	41.2989
								convergent extension	3.90523e-13	41.2197
								ear morphogenesis	3.9284e-13	41.2111
								negative regulation of macromolecule biosynthetic process	4.87696e-13	40.8991
								mesenchyme development	5.41149e-13	40.749
								negative regulation of transcription, DNA-dependent	1.07562e-12	39.758
								negative regulation of cellular metabolic process	1.30618e-12	39.4778
								cellular response to endogenous stimulus	1.35531e-12	39.4245
								somite development	1.36618e-12	39.413
								negative regulation of macromolecule metabolic process	1.44983e-12	39.3273
								cartilage development	1.77371e-12	39.0364
								mesenchymal cell development	2.3643e-12	38.6217
								connective tissue development	2.59543e-12	38.4872
								negative regulation of RNA metabolic process	2.58962e-12	38.4904
								central nervous system neuron differentiation	4.61918e-12	37.6555
								pharyngeal system development	6.29941e-12	37.2079
								regulation of anatomical structure morphogenesis	7.13527e-12	37.0282
								striated muscle tissue development	7.4896e-12	36.9582
								endocrine system development	7.51392e-12	36.9536
								digestive system development	9.16638e-12	36.6668
								neural crest cell differentiation	1.07117e-11	36.442
								canonical Wnt receptor signaling pathway	1.26733e-11	36.1994
								negative regulation of cellular biosynthetic process	1.34649e-11	36.112
								embryonic heart tube development	1.68413e-11	35.7892
								fin development	1.77785e-11	35.7111
								negative regulation of biosynthetic process	2.36105e-11	35.3018
								rhombomere morphogenesis	5.19075e-11	34.1653
								neural crest cell development	5.5165e-11	34.0775
								negative regulation of gene expression	5.60942e-11	34.0534
								negative regulation of nucleobase-containing compound metabolic process	6.11398e-11	33.9291
								regeneration	6.50523e-11	33.8396
								ameboidal cell migration	8.33316e-11	33.4823
								somitogenesis	9.45966e-11	33.2994
								muscle cell differentiation	1.11753e-10	33.059
								embryonic skeletal system development	1.24629e-10	32.9016
								muscle organ development	1.52674e-10	32.6088
								embryonic skeletal system morphogenesis	2.20166e-10	32.0807
								morphogenesis of embryonic epithelium	2.29833e-10	32.0187
								embryonic cranial skeleton morphogenesis	2.42161e-10	31.9433
								pronephros development	2.59363e-10	31.8443
								tissue regeneration	2.6457e-10	31.8156
								embryonic viscerocranium morphogenesis	3.04023e-10	31.6151
								dorsal/ventral pattern formation	3.6984e-10	31.3324
								transcription from RNA polymerase II promoter	4.1478e-10	31.1669
								segmentation	5.65517e-10	30.7197
								epithelial cell differentiation	8.31441e-10	30.1637
								embryonic camera-type eye development	8.55946e-10	30.1218
								otic vesicle development	1.66771e-09	29.1595
								retinal ganglion cell axon guidance	2.44186e-09	28.6094
								positive regulation of gene expression	2.80552e-09	28.4091
								striated muscle cell differentiation	3.30445e-09	28.1729
								embryonic pectoral fin morphogenesis	3.64733e-09	28.0305
								intracellular receptor signaling pathway	4.18439e-09	27.8323
								pectoral fin morphogenesis	4.48166e-09	27.7333
								digestive tract development	5.62108e-09	27.4065
								retina morphogenesis in camera-type eye	5.68917e-09	27.3891
								ectodermal placode formation	7.05242e-09	27.0792
								cellular response to hormone stimulus	7.26795e-09	27.0358
								negative regulation of transcription from RNA polymerase II promoter	7.9192e-09	26.912
								embryonic eye morphogenesis	1.11265e-08	26.4214
								appendage morphogenesis	1.16919e-08	26.3499
								embryonic appendage morphogenesis	1.24653e-08	26.2575
								cardioblast differentiation	1.31086e-08	26.1849
								hormone-mediated signaling pathway	1.37952e-08	26.1113
								determination of heart left/right asymmetry	1.37403e-08	26.117
								embryonic pattern specification	1.74322e-08	25.7737
								ectodermal placode development	1.78527e-08	25.7393
								cellular response to lipid	1.98415e-08	25.5869
								regulation of sequence-specific DNA binding transcription factor activity	2.03267e-08	25.552
								positive regulation of transcription, DNA-dependent	2.1169e-08	25.4935
								embryonic retina morphogenesis in camera-type eye	2.14465e-08	25.4747
								steroid hormone mediated signaling pathway	2.46026e-08	25.2766
								spinal cord development	2.51294e-08	25.246
								rostrocaudal neural tube patterning	2.50962e-08	25.248
								response to hormone stimulus	2.66396e-08	25.1619
								neural tube patterning	3.54076e-08	24.7514
								response to steroid hormone stimulus	5.11976e-08	24.2193
								regulation of neuron differentiation	5.46084e-08	24.1263
								regulation of developmental growth	5.88139e-08	24.0193
								cell differentiation in spinal cord	6.23975e-08	23.9339
								gland development	7.5824e-08	23.6528
								otic vesicle morphogenesis	7.64555e-08	23.6408
								cellular response to steroid hormone stimulus	7.85123e-08	23.6025
								regulation of histone modification	9.54225e-08	23.3211
								embryonic heart tube morphogenesis	9.62505e-08	23.3086
								embryonic camera-type eye morphogenesis	9.64748e-08	23.3053
								regulation of Wnt receptor signaling pathway	1.20768e-07	22.9813
								developmental growth involved in morphogenesis	1.49299e-07	22.6753
								morphogenesis of a branching structure	1.51167e-07	22.6574
								cardiac muscle tissue development	1.61302e-07	22.5637
								peripheral nervous system development	1.66834e-07	22.5151
								axis specification	1.70499e-07	22.4837
								skeletal muscle organ development	2.67386e-07	21.8346
								regulation of transmembrane receptor protein serine/threonine kinase signaling pathway	2.99084e-07	21.6729
								ephrin receptor signaling pathway	3.39491e-07	21.4901
								skeletal muscle tissue development	4.785e-07	20.995
								positive regulation of transcription from RNA polymerase II promoter	5.09636e-07	20.904
								post-anal tail morphogenesis	5.22879e-07	20.867
								convergent extension involved in gastrulation	5.45415e-07	20.8061
								motor neuron migration	6.6708e-07	20.5156
								fin morphogenesis	7.27911e-07	20.3897
								morphogenesis of a branching epithelium	7.98459e-07	20.2563
								otic placode formation	9.19464e-07	20.0527
								determination of left/right asymmetry in lateral mesoderm	9.25693e-07	20.043
								tube formation	9.4956e-07	20.0062
								regulation of embryonic development	1.0926e-06	19.8038
								hindbrain morphogenesis	1.12963e-06	19.7557
								cell recognition	1.26533e-06	19.5921
								muscle cell development	1.35293e-06	19.4955
								cell growth	1.36397e-06	19.4838
								neural crest cell migration	1.53135e-06	19.3168
								body morphogenesis	1.57176e-06	19.2792
								patterning of blood vessels	1.99367e-06	18.9361
								ventral spinal cord development	2.13728e-06	18.8358
								cellular response to growth factor stimulus	2.35856e-06	18.6937
								otic vesicle formation	2.39584e-06	18.671
								forebrain neuron differentiation	4.06107e-06	17.9097
								response to growth factor stimulus	4.32002e-06	17.8205
								striated muscle cell development	4.57215e-06	17.7387
								heart looping	4.6266e-06	17.7216
								regulation of canonical Wnt receptor signaling pathway	4.9496e-06	17.6243
								digestive tract morphogenesis	5.53435e-06	17.4632
								embryonic epithelial tube formation	5.81355e-06	17.3921
								mesoderm morphogenesis	6.14912e-06	17.3112
								regulation of cell proliferation	6.15209e-06	17.3105
								epithelial cell differentiation involved in kidney development	6.58668e-06	17.212
								cell fate specification	7.03021e-06	17.118
								spinal cord motor neuron differentiation	7.44912e-06	17.0345
								regulation of cell morphogenesis	7.69756e-06	16.9872
								nerve development	8.18326e-06	16.8989
								regulation of gastrulation	8.64577e-06	16.8196
								diencephalon development	9.76504e-06	16.6439
								head morphogenesis	1.07937e-05	16.4995
								kidney epithelium development	1.16538e-05	16.3888
								neuron recognition	1.30516e-05	16.2254
								nephric duct development	1.38309e-05	16.1417
								metencephalon development	1.38568e-05	16.139
								head development	1.39094e-05	16.1336
								regulation of growth	1.6079e-05	15.9245
								regulation of locomotion	1.68658e-05	15.8555
								cell differentiation involved in kidney development	1.80347e-05	15.7589
								negative regulation of cell differentiation	1.80849e-05	15.7549
								neural precursor cell proliferation	1.88689e-05	15.6936
								endocrine pancreas development	1.97364e-05	15.6288
								myeloid cell differentiation	2.10945e-05	15.5328
								regulation of cell projection organization	2.2964e-05	15.4103
								glomerular visceral epithelial cell differentiation	2.32894e-05	15.39
								nephron development	2.47283e-05	15.3035
								regulation of transforming growth factor beta receptor signaling pathway	2.96472e-05	15.0417
								regulation of cell motility	3.06621e-05	14.9932
								negative regulation of Wnt receptor signaling pathway	3.19613e-05	14.9333
								face morphogenesis	3.21549e-05	14.9246
								regulation of cell fate specification	3.70345e-05	14.7208
								monocarboxylic acid metabolic process	4.16281e-05	14.5521
								midbrain-hindbrain boundary development	4.1735e-05	14.5484
								neuron fate specification	5.07617e-05	14.2659
								pronephric glomerulus development	5.27944e-05	14.2093
								axonal fasciculation	5.7965e-05	14.0745
								cell fate determination	5.81962e-05	14.0687
								vasculogenesis	5.88059e-05	14.0537
								determination of digestive tract left/right asymmetry	6.92844e-05	13.8171
								developmental process involved in reproduction	7.3658e-05	13.7288
								foregut morphogenesis	8.01126e-05	13.6076
								neuron fate commitment	9.60236e-05	13.3463
								rhombomere 4 development	0.000106846	13.1922
								negative regulation of canonical Wnt receptor signaling pathway	0.000110344	13.1457
								regulation of organ morphogenesis	0.000119226	13.034
								axis elongation	0.000119281	13.0333
								negative regulation of mitotic cell cycle	0.000120588	13.0176
								regulation of cell morphogenesis involved in differentiation	0.000123833	12.9793
								glomerulus development	0.000123988	12.9775
								pronephric nephron development	0.00013724	12.831
								negative regulation of cell migration	0.000143852	12.7631
								regulation of axonogenesis	0.000145812	12.7436
								developmental cell growth	0.000146092	12.7408
								regulation of extent of cell growth	0.000149005	12.7124
								convergent extension involved in axis elongation	0.000159642	12.6129
								regulation of cell size	0.000161295	12.598
								pronephric duct development	0.000172664	12.4997
								regulation of axon extension	0.000174004	12.4886
								fin regeneration	0.000173842	12.4899
								positive regulation of cell differentiation	0.000188958	12.3696
								tissue homeostasis	0.000195521	12.3204
								neural tube formation	0.000196612	12.3124
								axon extension	0.00019665	12.3121
								cranial nerve development	0.000197074	12.309
								columnar/cuboidal epithelial cell differentiation	0.000252516	11.9513
								regulation of cell adhesion	0.000255995	11.9316
								morphogenesis of an epithelial sheet	0.000264875	11.8824
								regulation of BMP signaling pathway	0.000302875	11.689
								paraxial mesoderm development	0.000309638	11.6571
								regulation of neuron projection development	0.000343335	11.5081
								developmental pigmentation	0.000388363	11.3303
								negative regulation of cellular response to growth factor stimulus	0.000394056	11.3093
								establishment or maintenance of cell polarity	0.000401733	11.2815
								positive regulation of sequence-specific DNA binding transcription factor activity	0.000402651	11.2782
								embryonic camera-type eye formation	0.00056308	10.7944
								regulation of cellular component size	0.000565579	10.788
								neural nucleus development	0.000887148	10.1385
								lymph vessel development	0.000911926	10.0988
								bone development	0.000913187	10.0968
								negative regulation of locomotion	0.00109082	9.84037
								Wnt receptor signaling pathway involved in heart development	0.00118857	9.71656
								limb development	0.00134808	9.53488
								proteoglycan biosynthetic process	0.0014669	9.41301
								telencephalon development	0.00147404	9.40601
								non-canonical Wnt receptor signaling pathway	0.00152066	9.36109
								negative regulation of cell cycle	0.0015183	9.36333
								anatomical structure homeostasis	0.00158769	9.29886
								proteoglycan metabolic process	0.00175995	9.15025
								multicellular organismal homeostasis	0.00179107	9.12496
								forebrain neuron development	0.00181368	9.10686
								extracellular matrix organization	0.00202597	8.94717
								central nervous system neuron development	0.00211534	8.88489
								glycosaminoglycan biosynthetic process	0.00213352	8.87255
								retinoic acid metabolic process	0.00219348	8.83256
								glomerular visceral epithelial cell fate commitment	0.0024534	8.671
								organ formation	0.00249325	8.64776
								induction of positive chemotaxis	0.0031511	8.30993
								hematopoietic progenitor cell differentiation	0.0031949	8.29001
								hematopoietic stem cell differentiation	0.00386864	8.01396
								facial nucleus development	0.00439458	7.83006
								hippo signaling cascade	0.00485725	7.68564
								post-embryonic development	0.00586693	7.41318
								cartilage morphogenesis	0.00626402	7.3187
								closure of optic fissure	0.00642484	7.28212
								floor plate development	0.00751557	7.0559
								commissural neuron axon guidance	0.00767247	7.02609
								brain morphogenesis	0.011137	6.4885
								positive regulation of neurogenesis	0.0147465	6.08348
								regulation of organelle assembly	0.0157544	5.9881
								venous blood vessel development	0.022495	5.47425
								dorsal/ventral axis specification	0.0341519	4.87189
								chondroitin sulfate proteoglycan metabolic process	0.0366397	4.77045
								regulation of cell projection assembly	0.0411756	4.60207
								positive regulation of cell projection organization	0.0465642	4.42463
								cell migration in hindbrain	0.0471282	4.40727
								peptidyl-lysine dimethylation	0.0485406	4.36466
								The test set of 11,468 genomic regions picked 4,299 genes (25%) of all 17,059 genes.
								GO Biological Process has 4,067 terms covering 11,218 (66%) of all 17,059 genes.	4,067 ontology terms were tested (100%) using an annotation count range of [1, Inf].
								GREAT version 3.0.0
								Species assembly: danRer7
								Association rule: Single nearest gene: 5000 or 30000 bp max extension, curated regulatory domains included

## Sheet: 3-Related to Fig. 6C
Input	Term	Count	%	P-Value	Benjamini	(-)log2 Benjamini FDR
DEG (padj0.01 and FC1.5) associated with Class3 MPADs	multicellular organism development	32	45.7	6.1e-08	6.1e-05	14.0008
	cell differentiation	23	32.9	8.4e-08	4.2e-05	14.5393
	system development	29	41.4	1.2e-07	3.9e-05	14.6462
	single-organism developmental process	33	47.1	1.3e-07	3.3e-05	14.8872
	cellular developmental process	24	34.3	1.4e-07	2.8e-05	15.1242
	tissue development	19	27.1	1.8e-07	3.1e-05	14.9774
	developmental process	33	47.1	2.1e-07	3e-05	15.0247
	single-multicellular organism process	32	45.7	3.3e-07	4.2e-05	14.5393
	anatomical structure development	32	45.7	6.5e-07	7.3e-05	13.7417
	multicellular organismal process	33	47.1	1.4e-06	0.00015	12.7027
	animal organ development	22	31.4	4.6e-06	0.00042	11.2173
	anatomical structure morphogenesis	19	27.1	9.4e-05	0.0079	6.98393
	cell development	14	20	0.00019	0.015	6.05889
	muscle organ development	6	8.6	0.00024	0.017	5.87832
	epithelium development	11	15.7	0.00025	0.017	5.87832
	embryo development	13	18.6	0.00026	0.016	5.96578
	nervous system development	15	21.4	0.00031	0.018	5.79586
	myotube cell development	4	5.7	0.00046	0.025	5.32193
	skeletal muscle fiber development	4	5.7	0.00046	0.025	5.32193
	skeletal muscle organ development	5	7.1	0.00058	0.03	5.05889
DEG (padj0.01 and FC1.5) associated with Class4 MPADs	regulation of transcription, DNA-templated	25	73.5	1.9e-17	1.1e-14	46.3695
	regulation of nucleic acid-templated transcription	25	73.5	1.9e-17	5.7e-15	47.318
	regulation of RNA biosynthetic process	25	73.5	2e-17	3.9e-15	47.8654
	regulation of RNA metabolic process	25	73.5	3.4e-17	5e-15	47.507
	regulation of nucleobase-containing compound metabolic process	25	73.5	8.3e-17	1.3e-14	46.1285
	nucleic acid-templated transcription	25	73.5	8.6e-17	1.1e-14	46.3695
	RNA biosynthetic process	25	73.5	9.3e-17	9.2e-15	46.6273
	regulation of cellular macromolecule biosynthetic process	25	73.5	2.8e-16	1.6e-14	45.8289
	regulation of macromolecule biosynthetic process	25	73.5	3.3e-16	2.2e-14	45.3695
	regulation of gene expression	25	73.5	5.3e-16	3.2e-14	44.8289
	regulation of cellular biosynthetic process	25	73.5	5.3e-16	2.9e-14	44.9709
	regulation of biosynthetic process	25	73.5	6.1e-16	3.2e-14	44.8289
	regulation of nitrogen compound metabolic process	25	73.5	7.4e-16	3.5e-14	44.6996
	nucleobase-containing compound biosynthetic process	25	73.5	1.6e-15	6.9e-14	43.7204
	aromatic compound biosynthetic process	25	73.5	2.8e-15	1.1e-13	43.0476
	heterocycle biosynthetic process	25	73.5	2.9e-15	1.1e-13	43.0476
	organic cyclic compound biosynthetic process	25	73.5	5e-15	1.7e-13	42.4195
	cellular nitrogen compound biosynthetic process	26	76.5	2.5e-14	8.2e-13	40.1494
	cellular macromolecule biosynthetic process	26	76.5	4.7e-14	1.5e-12	39.2782
	RNA metabolic process	25	73.5	5.1e-14	1.5e-12	39.2782
	macromolecule biosynthetic process	26	76.5	5.8e-14	1.6e-12	39.1851
	regulation of macromolecule metabolic process	25	73.5	6e-14	1.6e-12	39.1851
	regulation of cellular metabolic process	25	73.5	6e-14	1.6e-12	39.1851
	regulation of primary metabolic process	25	73.5	6.6e-14	1.7e-12	39.0976
	gene expression	26	76.5	1.3e-13	3.2e-12	38.1851
	regulation of metabolic process	25	73.5	1.4e-13	3.2e-12	38.1851
	multicellular organism development	27	79.4	1.6e-13	3.5e-12	38.0558
	nucleic acid metabolic process	25	73.5	7.7e-13	1.7e-11	35.7757
	single-multicellular organism process	27	79.4	9e-13	1.9e-11	35.6152
	single-organism developmental process	27	79.4	1.5e-12	3.1e-11	34.9089
	anatomical structure development	27	79.4	1.8e-12	3.5e-11	34.7339
	developmental process	27	79.4	2.4e-12	4.6e-11	34.3396
	cellular biosynthetic process	26	76.5	4.2e-12	7.7e-11	33.5964
	organic substance biosynthetic process	26	76.5	6.3e-12	1.1e-10	33.0818
	transcription, DNA-templated	19	55.9	1.1e-11	1.9e-10	32.2933
	biosynthetic process	26	76.5	1.2e-11	2e-10	32.2193
	nucleobase-containing compound metabolic process	25	73.5	1.4e-11	2.3e-10	32.0176
	multicellular organismal process	27	79.4	1.7e-11	2.7e-10	31.7863
	heterocycle metabolic process	25	73.5	2.4e-11	3.7e-10	31.3318
	cellular aromatic compound metabolic process	25	73.5	2.8e-11	4.2e-10	31.1489
	organic cyclic compound metabolic process	25	73.5	4.7e-11	6.8e-10	30.4537
	cellular nitrogen compound metabolic process	26	76.5	6.6e-11	9.4e-10	29.9866
	nitrogen compound metabolic process	26	76.5	2.6e-10	3.6e-09	28.0494
	cellular macromolecule metabolic process	27	79.4	1.7e-08	2.4e-07	21.9905
	regulation of cellular process	28	82.4	1.3e-07	1.7e-06	19.166
	macromolecule metabolic process	27	79.4	1.9e-07	2.4e-06	18.6685
	regulation of biological process	28	82.4	3.4e-07	4.3e-06	17.8272
	brain development	9	26.5	1.6e-06	2e-05	15.6096
	animal organ development	16	47.1	2e-06	2.4e-05	15.3466
	biological regulation	28	82.4	2e-06	2.3e-05	15.408
	head development	9	26.5	2.4e-06	2.8e-05	15.1242
	cellular metabolic process	27	79.4	3.7e-06	4.3e-05	14.5053
	system development	18	52.9	5.5e-06	6.2e-05	13.9774
	nervous system development	13	38.2	5.7e-06	6.3e-05	13.9543
	primary metabolic process	27	79.4	6.9e-06	7.5e-05	13.7027
	central nervous system development	9	26.5	1.5e-05	0.00015	12.7027
	organic substance metabolic process	27	79.4	2e-05	0.00021	12.2173
	metabolic process	27	79.4	0.00014	0.0014	9.48036
	regulation of transcription from RNA polymerase II promoter	8	23.5	0.00023	0.0023	8.76415
	epithelium development	7	20.6	0.0027	0.026	5.26534
	single-organism process	29	85.3	0.0028	0.027	5.2109
	anatomical structure morphogenesis	11	32.4	0.0029	0.027	5.2109

## Sheet: 4-Related to Fig 4 - figsupp2C 
Term	Count	%	P-Value	Benjamini	(-)log2 Benjamini FDR
transcription, DNA-templated	232	15.2	9e-16	3.7e-12	37.9756
regulation of transcription, DNA-templated	255	16.8	1.8e-12	3.8e-09	27.9714
positive regulation of transcription from RNA polymerase II promoter	123	8.1	1.2e-08	1.6e-05	15.9316
positive regulation of transcription, DNA-templated	78	5.1	2.3e-07	0.00024	12.0247
covalent chromatin modification	43	2.8	2.1e-06	0.0018	9.11779
negative regulation of transcription from RNA polymerase II promoter	88	5.8	4.9e-06	0.0034	8.20025
positive regulation of dendritic spine development	11	0.7	2.5e-05	0.015	6.05889
protein N-linked glycosylation via asparagine	11	0.7	4.8e-05	0.025	5.32193
chaperone-mediated protein folding	11	0.7	6.5e-05	0.03	5.05889

## Sheet: 5-Related to Fig 5 - figsupp1D 
Ontology	# Term Name	Binom FDR Q-Val	(-)log2 Binom FDR
GO Biological Process	steroid hormone mediated signaling pathway	0.000715741	10.4483
	cellular response to hormone stimulus	0.000937091	10.0595
	hormone-mediated signaling pathway	0.00126035	9.63196
	response to steroid hormone stimulus	0.00133936	9.54424
	cellular response to steroid hormone stimulus	0.00132458	9.56025
	cellular response to lipid	0.00274145	8.51085
	single-organism membrane organization	0.0129798	6.26759
	Notch signaling pathway	0.0211423	5.56372
	cell differentiation in spinal cord	0.0350755	4.83339
	regulation of canonical Wnt receptor signaling pathway	0.0390177	4.67973
	developmental maturation	0.0385646	4.69658
	morphogenesis of embryonic epithelium	0.0494394	4.33819
The test set of 3,152 genomic regions picked 2,031 genes (12%) of all 17,059 genes.
GO Biological Process has 4,067 terms covering 11,218 (66%) of all 17,059 genes.	4,067 ontology terms were tested (100%) using an annotation count range of [1, Inf].
GREAT version 3.0.0
Species assembly: danRer7
Association rule: Single nearest gene: 100000 bp max extension, curated regulatory domains included
