# Supplementary material for: TALE factors use two distinct functional modes to control an essential zebrafish gene expression program
Source: eLife. 2018 Jun 18;7:e36144. doi: 10.7554/eLife.36144 (PMC6023610; doi:10.7554/eLife.36144)
Supplement: Supplementary file 4. — Related to Figure 6. [file elife-36144-supp4.xlsx]

## Sheet: Supp File 4
	Supplementary File 4. Information on TALE GRN genes associated with Class 4 MPADs. Related to Figure 6.
	zebrafish gene name	Mouse ortholog	Distance from Class4 MPADa	Biological function relevant to the studyb	Ref
	bhlhe22*	bhlhe22 bhlhb5	2,400bp	bhlhe22 specifies neuronal identity in the mouse neo-cortex and retina.	1, 2
	bhlhb5
	crygmx	not found	15,500bp	not found
	dand5	dand5	3,800bp	dand5 controls of left-right patterning through the regulation of the Nodal pathway in zebrafish and mouse. In xenopus it induces anterior ectoderm fate through negative regulation of BMP, TGFB and Wnt signaling pathways.	3, 4
	charon cerberus	coco
		cerl2
	dmrt2a*	dmrt2	50bp	dmrt2a regulates neurogenesis in the posterior-dorsal telencephalon in zebrafish.	5
	drgx*	prrxl1	230bp	drgx controls the formation of the principal sensory nucleus of the trigeminal facial nerve in mouse.	6, 7
	drg11	drg11
	prrxl1
	epha7	epha7	100bp	epha7 regulates embryonic forebrain cortical neurons homeostasis in mouse.	8
	hmx1*	hmx1	3,500bp	hmx1 is a regulator eye development in human, mouse and zebrafish.	9, 10, 11
	nkx5.3	nkx5.3		It also controls ear development, cranofacial morphogenesis and cranial sensory nerve branching in mouse.
	hoxa2b*	hoxa2	4,200bp	hoxa2 ensures the specification of 2nd branchial arch derived structures, cranio-facial and hindbrain patterning in mouse and zebrafish.	12, 13, 14, 15, 16, 17
				It also regulates neurogenesis in the hindbrain and formation and ear formation in mouse. Consistently, a mutation in the human hoxa2 gene is associated with ear developmental defects.
	hoxa9b*	hoxa9	15,000bp	not found
	hoxa10b*	hoxa10	21,000bp	not found
	hoxa11b*	hoxa11	26,000bp	not found
	hoxb1a*	hoxb1	190bp	hoxb1a controls the formation hindbrain rhombomere 4, hindbrain neurogenesis and cranial nerves in mouse and zebrafish.	18, 19, 20, 21, 22
				A loss of funtion mutation in the human hoxb1 gene is associated with facial palsy, hearing loss and strabismus.
	hoxb2a*	hoxb2	11,000bp	hoxb2a controls the specification of the 2nd branchial arch and hindbrain patterning in zebrafish.	12, 13, 16, 19
				hoxb2 controls neural development and formation of the VIIth cranial nerve in the mouse hindbrain
	hoxb5a*	hoxb5	3,000bp	not found
	hoxb6a*	hoxb6	13,000bp	not found
	hoxc1a*	hoxc1	150bp	not found
	hoxc10a*	hoxc10	1,500bp	not found
	jph1a	jph1	320bp	not found
	kirrelb	kirrel	130bp	not found
		neph1
	lhx9*	Lhx9	125bp	lhx9 induces the specification of hypocretin neurons in mouse and zebrafish.	24, 25, 26
		Lh2b		It is also necessary for the formation of the pineal gland in mouse and the differentiation and compartmentalization of neuronal populations in the zebrafish caudal forebrain.
	mab21l2*	mab21l2	130bp	mab21l2 is necessary for proper eye development in mouse.	27, 28
			3,700bp	Consistently, a mutation in the human mab21l2 gene is associated with eye development defects and cranial skeletal dysplasia, introducing the mutation in the zebrafish mab21l2 gene leads to similar defects.
			4,700bp
	mafba*	mafb kreisler	130bp	mafb is a regulator of hindbrain segmentation in mouse and zebrafish.	29, 30
	valentino kreisler
	nkx2-5*	nkx2.5	2,700bp	nkx2.5 is a critical regulator of heart development in mouse and zebrafish.	31, 32, 33
				Mutations in the nkx2.5 human gene are associated with congenital heart defects.
	nr2f2*	nr2f2	19,000bp	nr2f2 regulates the development of the eye and amygdale, as well the generation of forebrain neurons in mouse.	34, 35, 36
	COUPTFbeta	tcfcoup2
	COUP-TF2	COUP-TF2
	pax5*	pax5	4,400bp	pax5 controls ear development in zebrafish, mid-hindbrain organizer development in chick and the formation of the posterior midbrain and cerebellum in mouse.	37, 38, 39
		BSAP
	pou3f2b*	pou3f2	125bp	pou3f3b controls the positioning and migration of cortical neurons in mouse.	40, 41
		brn2		It also controls the determination of hypothalamic neurons in mouse and zebrafish.
	pou3f3b*	pou3f3	20bp	pou3f3b controls the production and migration of neocortical neurons in mouse.	40
		brn1
	ppp1r13ba	ppp1r13b	20,200bp	not found
	six3a*	six3	7,100bp	six3a controls the formation of eyes and nose structures by controlling anterior forebrain specification in mouse and zebrafish.	42
	slc25a15a	slc25a15	2,100bp	not found
	sox21b*	sox21	1,650bp	sox21b is necessary for lens formation in zebrafish and neuronal differentiation in chick and xenopus	43, 44, 45
		sox25
	a. Distance in base pairs between the gene TSS and the center of the closest Class 4 MPAD.
	b. Only published information directly related to the TALE phenotype were selected.
	* These genes encode transcription factors.
	References
	1	Feng, L. et al. Requirement for Bhlhb5 in the specification of amacrine and cone bipolar subtypes in mouse retina. Development 133, 4815–4825 (2006).
	2	Joshi, P. S. et al. Bhlhb5 regulates the postmitotic acquisition of area identities in layers II-V of the developing neocortex. Neuron 60, 258–272 (2008).
	3	Bell, E., Muñoz-Sanjuán, I., Altmann, C. R., Vonica, A. & Brivanlou, A. H. Cell fate specification and competence by Coco, a maternal BMP, TGFbeta and Wnt inhibitor. Development 130, 1381–1389 (2003).
	4	Oki, S. et al. Reversal of left-right asymmetry induced by aberrant Nodal signaling in the node of mouse embryos. Development 136, 3917–3925 (2009).
	5	Yoshizawa, A. et al. Zebrafish Dmrta2 regulates neurogenesis in the telencephalon. Genes Cells 16, 1097–1109 (2011).
	6	Wang, C.-Z. et al. Development of the mesencephalic trigeminal nucleus requires a paired homeodomain transcription factor, Drg11. Mol. Cell. Neurosci. 35, 368–376 (2007).
	7	Ding, Y.-Q., Yin, J., Xu, H.-M., Jacquin, M. F. & Chen, Z.-F. Formation of whisker-related principal sensory nucleus-based lemniscal pathway requires a paired homeodomain transcription factor, Drg11. J. Neurosci. 23, 7246–7254 (2003).
	8	Depaepe, V. et al. Ephrin signalling controls brain size by regulating apoptosis of neural progenitors. Nature 435, 1244–1250 (2005).
	9	Munroe, R. J. et al. Mouse H6 Homeobox 1 (Hmx1) mutations cause cranial abnormalities and reduced body mass. BMC Dev. Biol. 9, 27 (2009).
	10	Quina, L. A., Tempest, L., Hsu, Y.-W. A., Cox, T. C. & Turner, E. E. Hmx1 is required for the normal development of somatosensory neurons in the geniculate ganglion. Dev. Biol. 365, 152–163 (2012).
	11	Schorderet, D. F. et al. Mutation in the human homeobox gene NKX5-3 causes an oculo-auricular syndrome. Am. J. Hum. Genet. 82, 1178–1184 (2008).
	12	Hunter, M. P. & Prince, V. E. Zebrafish hox paralogue group 2 genes function redundantly as selector genes to pattern the second pharyngeal arch. Dev. Biol. 247, 367–389 (2002).
	13	Davenne, M. et al. Hoxa2 and Hoxb2 control dorsoventral patterns of neuronal development in the rostral hindbrain. Neuron 22, 677–691 (1999).
	14	Alasti, F. et al. A mutation in HOXA2 is responsible for autosomal-recessive microtia in an Iranian family. Am. J. Hum. Genet. 82, 982–991 (2008).
	15	Gendron-Maguire, M., Mallo, M., Zhang, M. & Gridley, T. Hoxa-2 mutant mice exhibit homeotic transformation of skeletal elements derived from cranial neural crest. Cell 75, 1317–1331 (1993).
	16	Barrow, J. R. & Capecchi, M. R. Targeted disruption of the Hoxb-2 locus in mice interferes with expression of Hoxb-1 and Hoxb-4. Development 122, 3817–3828 (1996).
	17	Santagati, F., Minoux, M., Ren, S.-Y. & Rijli, F. M. Temporal requirement of Hoxa2 in cranial neural crest skeletal morphogenesis. Development 132, 4927–4936 (2005).
	18	Weicksel, S. E., Gupta, A., Zannino, D. A., Wolfe, S. A. & Sagerström, C. G. Targeted germ line disruptions reveal general and species-specific roles for paralog group 1 hox genes in zebrafish. BMC Dev. Biol. 14, 25 (2014).
	19	Gavalas, A., Ruhrberg, C., Livet, J., Henderson, C. E. & Krumlauf, R. Neuronal defects in the hindbrain of Hoxa1, Hoxb1 and Hoxb2 mutants reflect regulatory interactions among these Hox genes. Development 130, 5663–5679 (2003).
	20	Webb, B. D. et al. HOXB1 founder mutation in humans recapitulates the phenotype of Hoxb1-/- mice. Am. J. Hum. Genet. 91, 171–179 (2012).
	21	Arenkiel, B. R., Tvrdik, P., Gaufo, G. O. & Capecchi, M. R. Hoxb1 functions in both motoneurons and in tissues of the periphery to establish and maintain the proper neuronal circuitry. Genes Dev. 18, 1539–1552 (2004).
	22	Rossel, M. & Capecchi, M. R. Mice mutant for both Hoxa1 and Hoxb1 show extensive remodeling of the hindbrain and defects in craniofacial development. Development 126, 5027–5040 (1999).
	23	Choe, S.-K., Zhang, X., Hirsch, N., Straubhaar, J. & Sagerström, C. G. A screen for hoxb1-regulated genes identifies ppp1r14al as a regulator of the rhombomere 4 Fgf-signaling center. Dev. Biol. 358, 356–367 (2011).
	24	Liu, J. et al. Evolutionarily conserved regulation of hypocretin neuron specification by Lhx9. Development 142, 1113–1124 (2015).
	25	Yamazaki, F. et al. The Lhx9 homeobox gene controls pineal gland development and prevents postnatal hydrocephalus. Brain Struct Funct 220, 1497–1509 (2015).
	26	Peukert, D., Weber, S., Lumsden, A. & Scholpp, S. Lhx2 and Lhx9 determine neuronal differentiation and compartition in the caudal forebrain by regulating Wnt signaling. PLoS Biol. 9, e1001218 (2011).
	27	Yamada, R., Mizutani-Koseki, Y., Koseki, H. & Takahashi, N. Requirement for Mab21l2 during development of murine retina and ventral body wall. Dev. Biol. 274, 295–307 (2004).
	28	Deml, B. et al. Mutations in MAB21L2 result in ocular Coloboma, microcornea and cataracts. PLoS Genet. 11, e1005002 (2015).
	29	Moens, C. B., Cordes, S. P., Giorgianni, M. W., Barsh, G. S. & Kimmel, C. B. Equivalence in the genetic control of hindbrain segmentation in fish and mouse. Development 125, 381–391 (1998).
	30	Sadl, V. S., Sing, A., Mar, L., Jin, F. & Cordes, S. P. Analysis of hindbrain patterning defects caused by the kreisler(enu) mutation reveals multiple roles of Kreisler in hindbrain segmentation. Dev. Dyn. 227, 134–142 (2003).
	31	Targoff, K. L. et al. Nkx genes are essential for maintenance of ventricular identity. Development 140, 4203–4213 (2013).
	32	Chung, I.-M. & Rajakumar, G. Genetics of Congenital Heart Defects: The NKX2-5 Gene, a Key Player. Genes (Basel) 7, 6 (2016).
	33	Lyons, I. et al. Myogenic and morphogenetic defects in the heart tubes of murine embryos lacking the homeo box gene Nkx2-5. Genes Dev. 9, 1654–1666 (1995).
	34	Naka, H., Nakamura, S., Shimazaki, T. & Okano, H. Requirement for COUP-TFI and II in the temporal specification of neural stem cells in CNS development. Nat. Neurosci. 11, 1014–1023 (2008).
	35	Tang, K., Tsai, S. Y. & Tsai, M.-J. COUP-TFs and eye development. Biochim. Biophys. Acta 1849, 201–209 (2015).
	36	Tang, K., Rubenstein, J. L. R., Tsai, S. Y. & Tsai, M.-J. COUP-TFII controls amygdala patterning by regulating neuropilin expression. Development 139, 1630–1639 (2012).
	37	Funahashi, J. et al. Role of Pax-5 in the regulation of a mid-hindbrain organizer's activity. Dev. Growth Differ. 41, 59–72 (1999).
	38	Kwak, S.-J. et al. Zebrafish pax5 regulates development of the utricular macula and vestibular function. Dev. Dyn. 235, 3026–3038 (2006).
	39	Urbánek, P., Fetka, I., Meisler, M. H. & Busslinger, M. Cooperation of Pax2 and Pax5 in midbrain and cerebellum development. Proc. Natl. Acad. Sci. U.S.A. 94, 5703–5708 (1997).
	40	Sugitani, Y. et al. Brn-1 and Brn-2 share crucial roles in the production and positioning of mouse neocortical neurons. Genes Dev. 16, 1760–1765 (2002).
	41	Nakai, S. et al. The POU domain transcription factor Brn-2 is required for the determination of specific neuronal lineages in the hypothalamus of the mouse. Genes Dev. 9, 3109–3121 (1995).
	42	Lagutin, O. V. et al. Six3 repression of Wnt signaling in the anterior neuroectoderm is essential for vertebrate forebrain development. Genes Dev. 17, 368–379 (2003).
	43	Pauls, S., Smith, S. F. & Elgar, G. Lens development depends on a pair of highly conserved Sox21 regulatory elements. Dev. Biol. 365, 310–318 (2012).
	44	Sandberg, M., Källström, M. & Muhr, J. Sox21 promotes the progression of vertebrate neurogenesis. Nat. Neurosci. 8, 995–1001 (2005).
	45	Whittington, N., Cunningham, D., Le, T.-K., De Maria, D. & Silva, E. M. Sox21 regulates the progression of neuronal differentiation in a dose-dependent manner. Dev. Biol. 397, 237–247 (2015).
	46	Griesel, G. et al. Sp8 controls the anteroposterior patterning at the midbrain-hindbrain border. Development 133, 1779–1787 (2006).
	47	Bell, S. M. et al. Sp8 is crucial for limb outgrowth and neuropore closure. Proc. Natl. Acad. Sci. U.S.A. 100, 12195–12200 (2003).
	48	Martino, V. B. et al. Conditional deletion of AP-2β in mouse cranial neural crest results in anterior segment dysgenesis and early-onset glaucoma. Dis Model Mech 9, 849–861 (2016).
	49	Knight, R. D., Javidan, Y., Zhang, T., Nelson, S. & Schilling, T. F. AP2-dependent signals from the ectoderm regulate craniofacial development in the zebrafish embryo. Development 132, 3127–3138 (2005).
	50	Satoda, M. et al. Mutations in TFAP2B cause Char syndrome, a familial form of patent ductus arteriosus. Nat. Genet. 25, 42–46 (2000).
	51	Nyholm, M. K., Wu, S.-F., Dorsky, R. I. & Grinblat, Y. The zebrafish zic2a-zic5 gene pair acts downstream of canonical Wnt signaling to control cell proliferation in the developing tectum. Development 134, 735–746 (2007).
	52	Nyholm, M. K., Abdelilah-Seyfried, S. & Grinblat, Y. A novel genetic mechanism regulates dorsolateral hinge-point formation during zebrafish cranial neurulation. J. Cell. Sci. 122, 2137–2148 (2009).
	53	Inoue, T. et al. Mouse Zic5 deficiency results in neural tube defects and hypoplasia of cephalic neural crest derivatives. Dev. Biol. 270, 146–162 (2004).
