# Supplementary material for: TALE factors use two distinct functional modes to control an essential zebrafish gene expression program
Source: eLife. 2018 Jun 18;7:e36144. doi: 10.7554/eLife.36144 (PMC6023610; doi:10.7554/eLife.36144)
Supplement: Supplementary file 5. [file elife-36144-supp5.xlsx]

## Sheet: Supp File 5
	Supplementary File 5: Primer sequences used in this study
	Primer name	Primer sequence (5' 3')	Purpose
	sall1aChIPF	GACAATTGAAGCGCTGCTC	ChIP-qPCR Related to figure 3C
	sall1aChIPR	GTATCCTTTGCTCCAACACG
	epha4aChIPF	TGAGACCCTTTATGCCTTTATCA
	epha4aChIPR	TTGGTGCGCAACTCTAACTC
	hmx2ChIPF	TTTATGCTCGCATGTGTGTG
	hmx2ChIPR	AAAGCTCCTGGCTTGCTAGTT
	dlaChIPF	CCTGCTGGGTTGTTTCTCTC
	dlaChIPR	GCGTGTGTGTGTGTGTGTGT
	fgfr3ChIPF	CTAACCCACAGTGCCACAGA
	fgfr3ChIPR	GGGATGTTCTAAGGGGGTGT
	sox21aChIPF	CTTCTTATTGGCCCACTTCG
	sox21aChIPR	CTTTACATTTTCGCGGCTGT
	ephb3ChIPF	CGGCTCTGAAATCAAGGAAA
	ephb3ChIPR	CGCCGGATTACACAGTGG
	meis1bChIPF	GCCCCTCAGACAAAACTAACG
	meis1bChIPR	GCGGAGGATCATCATTCATT
	hs3st3b1bChIPF	CGCCTTTATTTAAACGAGCAC
	hs3st3b1bChIPR	GAGTGTGTCTGAGCGCTTTC
	otx1bChIPF	GGCCTTCGCTGATGTTCTAC
	otx1bChIPR	CTTCTCCTAACCCTGCCTCTC
	cicaChIPF	GGAGCCATCTGTCAAAGTCC
	cicaChIPR	CCCTCCCTTTAACTCCCATT
	hoxb1aChIPF	ATTCGGAGAGCCTTTCACGCAGGGTTTGAC	ChIP-qPCR Related to figures 3C 6F and figure 1 figure supplement 1C
	hoxb1aChIPR	TTTACCTCAGCTGCTGGTCACGTGAGACGT
	pou3f2bChIPF	TTGAGGGAAGAAGGCAGTGT	ChIP-qPCR Related to figures 6F and 7F
	pou3f2bChIPR	CGCTTATTGGCTGAGAAAGG
	Zic5ChIPF	GGAGGACACAGTGGGGAATA
	Zic5ChIPR	CTCTGCGCTGAAAGACAGC
	mafbaChIPF	TGGTTGTTTGTGTGCTGTCA
	mafbaChIPR	GACAAACGGCTCCTCGTTAG
	pou3f3bChIPF	GAGTGCCTGAAGCGAGTTCT
	pou3f3bChIPR	ACATCGTCCACGTCTTTTCC
	dmrt2aChIPF	CCGTCATCTGATAGGCTCGT
	dmrt2a9ChIPR	CACTGCGGTGTGATGAGAGT
	pax5ChIPF	ATCGGCGTCGTCTTTATCTG
	pax5ChIPR	GTCCGAGCGAGACTGTCAAT
	tcf3aChIPF	GATGGCACGATAGACCCACT
	tcf3aChIPR	AGGGTGTGCATGGAAGAGAG
	Otx1bChIPF2	CTTCCTGAAGCCTTCCACTG
	Otx1bChIPR2	GCAAAGGCGCACTTATGTTT
	Tle3aChIPF2	ACGGGCACTAGCTTGAGAAA
	Tle3aChIpR2	ATCTGCCGCCCTTTAAAAAT
	Mab21l2ChIPF1	TGCGGTCGGTATAGCCTAA
	Mab21l2ChIPR1	GGCGTTTGTTCATAGCCAAT
	gapdhF1	TGCTGGTATTGCTCTCAACG	qRT-PCR Related to figure 7E
	gapdhR1	AACAGCAAAGGGGTCACATC
	lhx9F1	TTCAAGGGATCATGGAGGAG
	lhx9R1	CTCATGGAGGGCATAGTCGT
	hmx1F1	CACACTTCCACCACATCCAG
	hmx1R1	GGTAGCGCTTGAGAGCATTC
	six3aF1	ATGCGATCATTCTCCCAGTC
	six3aR1	GTAGGGACACCAAGCCAAGA
	zic5F1	CCGTAGTTGGCGAAAACAAT
	zic5R1	CTGATGAGGAAGGGCTTGAG
	mab21l2bF1	CGGTGCCCACATTACTTCTT
	mab21l2R1	CTCTTGCCAGTCTCCAGGTC
	dand5F1	GCAGACAGGAGGAAACAAGG
	dand5bR1	GGCACAGCTCTGTTTGTTCA
	nr2f2F1	TGTGAAAGCTTGCAATTTCG
	nr2f2R1	TGGTCCATATGTGGCAGAGA
	bhlhe22F1	ATGTTTGCCAGCGGTTTTAC
	bhlhe22R1	CACGCTCACCAGCACTTAAA
	sox21bF1	CACCGAGTCTCTGATGAGCA
	sox21bR1	GAGTATGGGTTTGCGGACAT
	drgxF1	GCACAGACGCACTATCCAGA
	drgxR1	TCCACTTTGCTCTTCGGTTT
	pou3f2bF1	CGAGAGTCATGGCGACTACA
	pou3f2bR1	TCACTCTGCAACAGGGTTTG
	pax5F1	CTGCTGGCAGAGAGAGTGTG
	pax5R1	ACTGCCACGGTAGAGGCTAA
	dmrt2aF1	AGCAAACGTGGAGCTCATCT
	dmrt2aR1	AGCGTTCAGGAGACATTGCT
	pou3f3bF1	CACTTTGCCAAGCAGTTCAA
	pou3f3bR1	CAGATTGTGGTCTGCGAGAA
	hoxb1aF1	CTAGTGACAGCTATAACGCTGATGGACGAC
	hoxb1aR1	CTTGTTGTCCCAGTTCCACCATAGGTAAGG
	sp8aF1	CTTTCACTCGGAATGGTGGT
	sp8aR1	CGGAGTAGTCGTTTCCGAAG
	nkx2.5F1	GCATCAGAGCTTGGTGAACA
	nkx2.5R1	TCCCAGCCAAACCATATCTC
	mafbaF1	AAAACACAGCACCCTTCCAC
	mafbaR1	CGCAGCACTTCAACTCAAAA
	epha7F1	GCCACGTTCCCAGATACAGT
	epha7R1	GCAGTGCATTTTGGGAGAAT
	tfap2bF1	TGTGACACGTCCACCATCTT
	tfap2bR1	AAAGGACAGCCTGCGTCTAA
	kirrelbF1	CCAATGGACACAGACACTGG
	kirrelbR1	AGCGAGGCTCTATGGACAAA
	otx1bF1	CAGAGGAGAAGGACGGAGTG
	otx1bR1	TCATGCTAGAGGCAGTCACG
	ztcf3aF1	AGGCATCATGGGAAACAGAG
	ztcf3aR1	TAGAAGGAGAGCCCACAGGA
	ztle3aF1	CATGGTGAGGTTGTTTGTGC
	ztle3aR1	TGAGAAACCGGACTCTTGCT
	EcoRI NF-YA For	ACGTGAATTCGCCAACATGGAGCAGTACA	Cloning of zebrafish NF-YA coding sequence in PCS2+
	XhoI NF-YA Rev	ACGTCTCGAGTTACCCCAGAGGCGGGG
	EcoRI Kozak Flag tag For	ATGCGAATTCGCCGCCATGGACTACAAAGACCATGA	Cloning of 3xflag tag coding sequence 5' to NF-YA
	Flag tag EcoRI Rev	ATGCGAATTCGGCCGCAAGCTTGTCATCG
	XbaI NF-YB For	ATGCTCTAGAGACGGAGAGAGTTCAACCAC	Cloning of zebrafish NF-YB coding sequence in PCS2+
	NF-YB snabI Rev	GCATTACGTACTAAGAAAACTGGAGCTGTT
	StuI Kozak Flag tag For	ATGCAGGCCTGCCGCCATGGACTACAAAGACCATGA	Cloning of 3xflag tag coding sequence 5' to NF-YB
	Flag tag XbaI Rev	ATGCTCTAGAGGCCGCAAGCTTGTCATCG
	MutNFY29mF	AGCCGGTGGACGCTTTTTCTCTC	Generation of NF-YDN by introduction of a triple mutation R279A, G280A, D281A in the zebrafish NF-YA protein (Mantovani et al., J. Biol. Chem 269:20340-20346)
	MutNFY29mR	GCAGCCTTCCTGGCCATAGCATG
	Tle3a-enh1F1	ATGCCTCGAGGAAAAAAATAGATGACATTAC	Cloning of Prep1 binding sites. Each primer contains an XhoI site CTCGAG used to clone in luciferase vector
	Tle3a-enh1R1	ATGCCTCGAGGCTAGCGCTGGGAATACGA
	Pax5-enh1F1	ATGCCTCGAGGCAAACGGATATTTTAAAAT
	Pax5-enh1R1	ATGCCTCGAGGTGCGTAAAAATCCAAGTAA
	Prdm14-XhoIenhF1	ATGCCTCGAGCCCCTCTTCTTTGTCCCTTG
	Prdm14-XhoIenhR1	ATGCCTCGAGGGTAGGCTATCTGGACGGATAAT
	Tcf3a-enh1F1	ATGCCTCGAGTACTGCGTTAATCGCGCGTT
	Tcf3a-enh1R1	ATGCCTCGAGGTTAGTGTGATATAATCTGT
	Her6-enh1F1	ATGCCTCGAGTTCTTTTATAATTGTACTG
	Her6-enh1R1	ATGCCTCGAGTGATGTAAATAGAAATACTG
	Dachb-enh1F1	ATGCCTCGAGCGGTTTCTTTGCCATTCTTT
	Dachb-enh1R1	ATGCCTCGAGAACTAAGAACAATGTACG
	Fgf8a-XhoIenhF1	ATGCCTCGAGGGAGGTCGTTTGCGTATTTG
	Fgf8a-XhoIenhR1	ATGCCTCGAGCTTGTCAATCCACCCTGCTT
