# Supplementary figures and images for: TALE factors use two distinct functional modes to control an essential zebrafish gene expression program
Source: eLife journal article supplement (doi:10.7554/elife.36144), 2018-06-18

Figure 2 - figure supplement 1

A

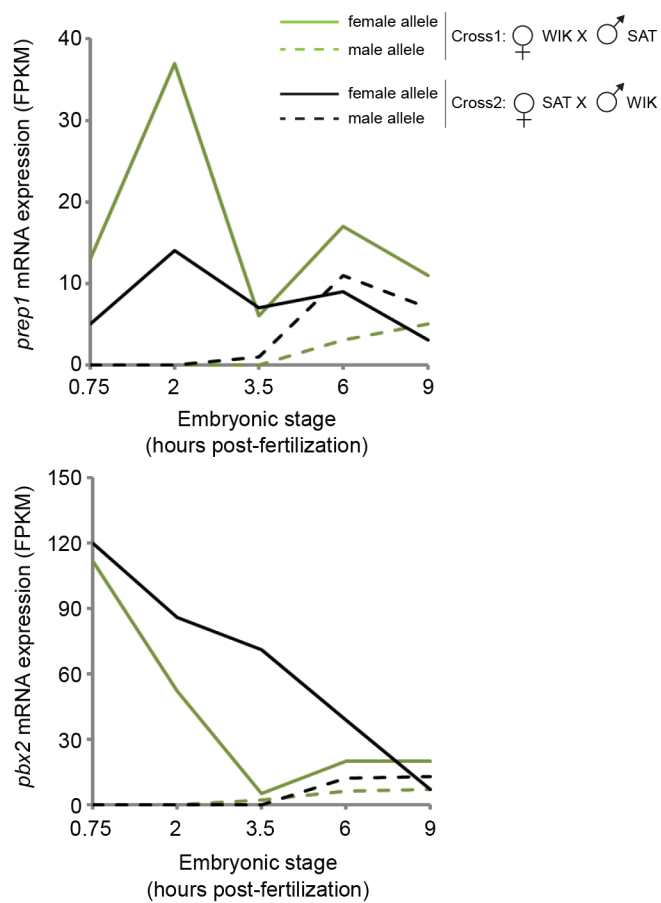

B

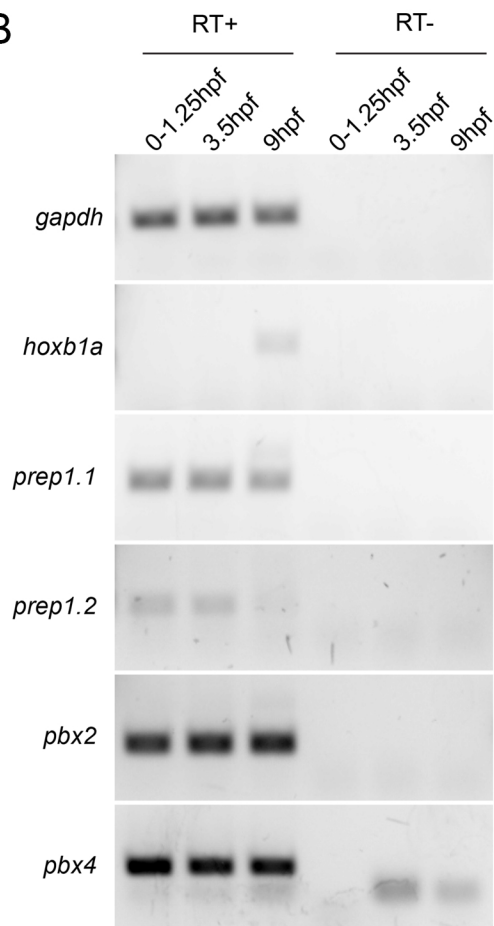

C

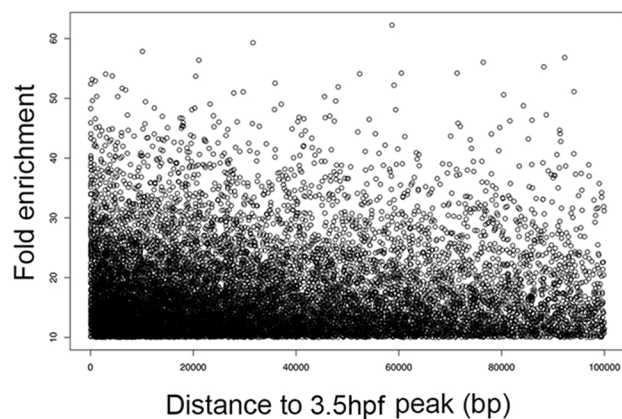

Supplement: supp [file elife-36144-supp-v1.zip]

Figure 1 - figure supplement 1

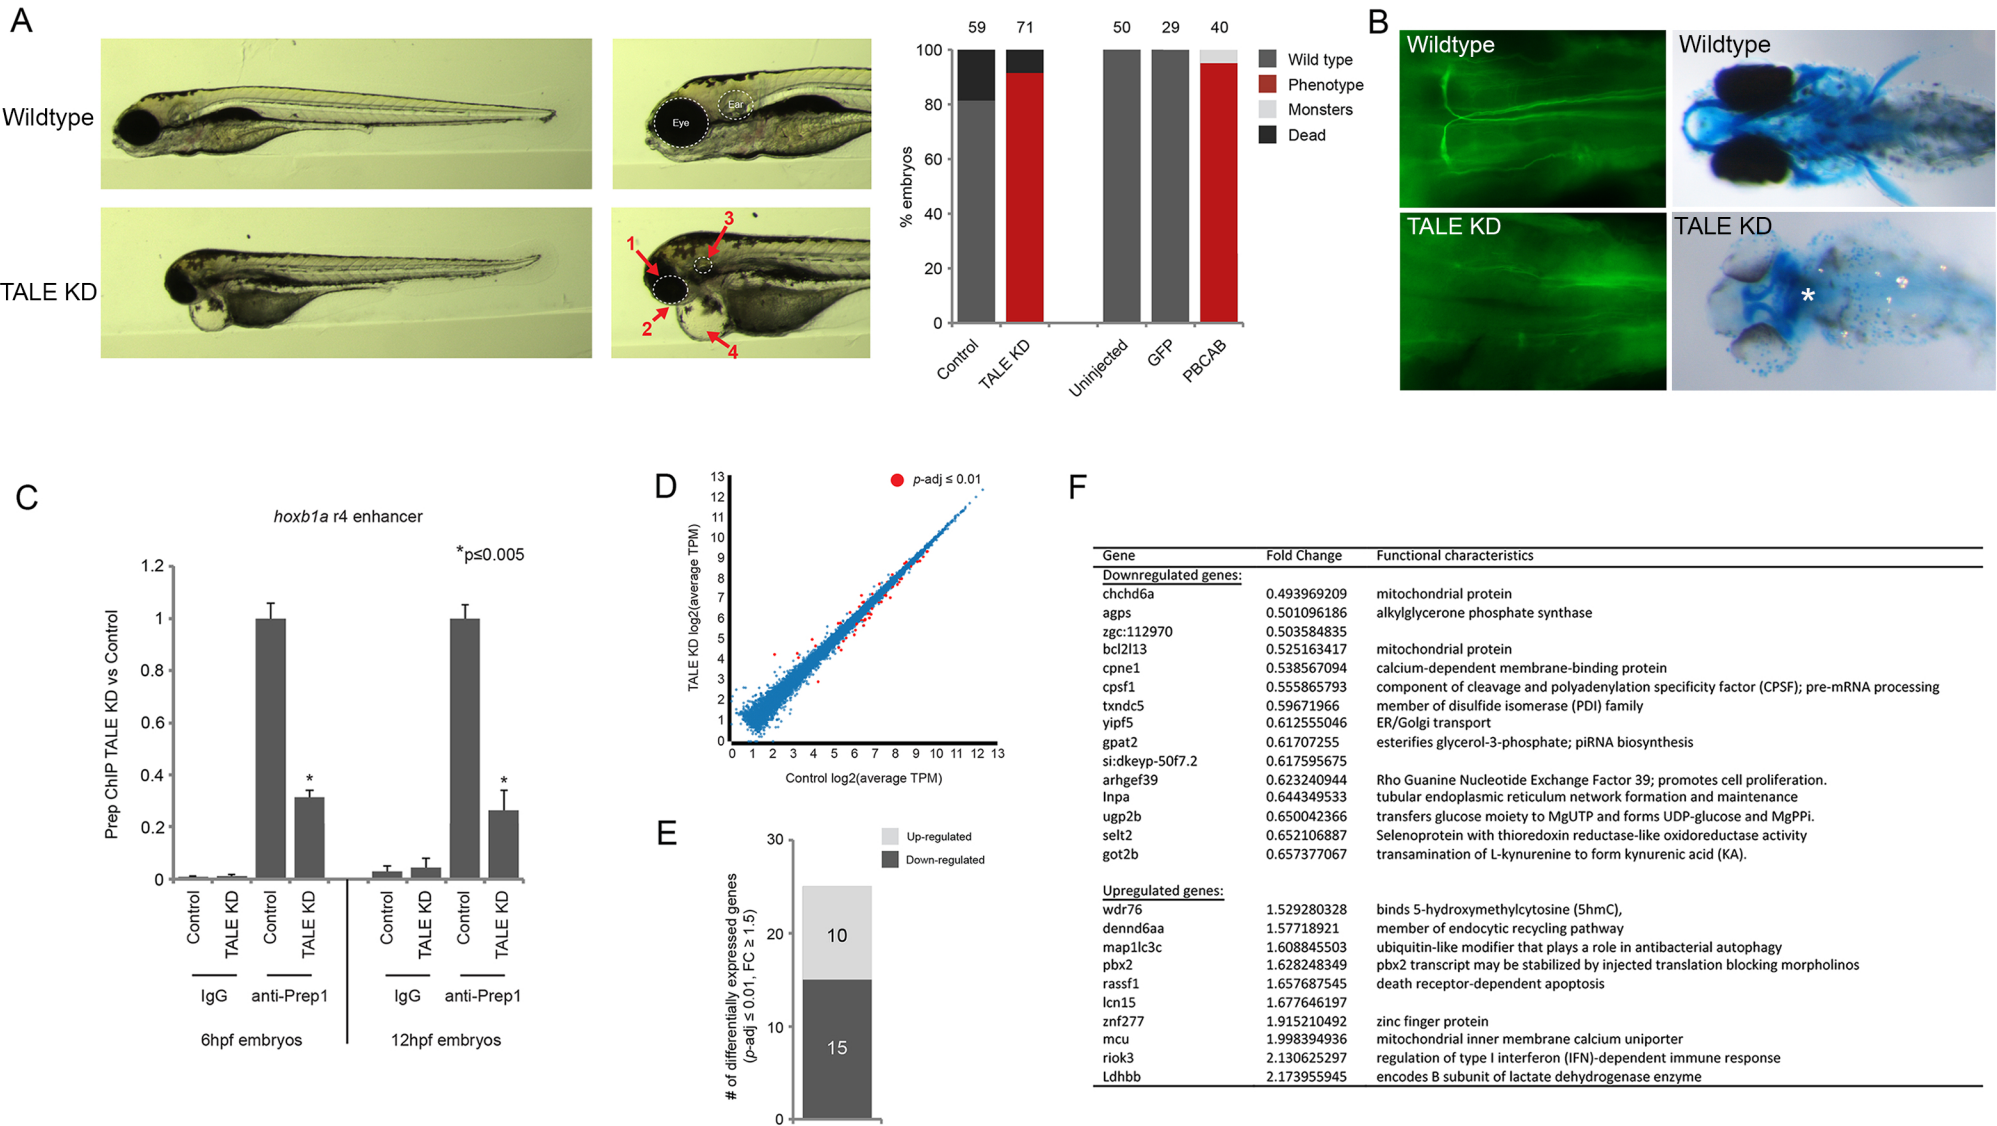

Supplement: supp [file elife-36144-supp-v1.zip]

# Figure 4 - figure supplement 2

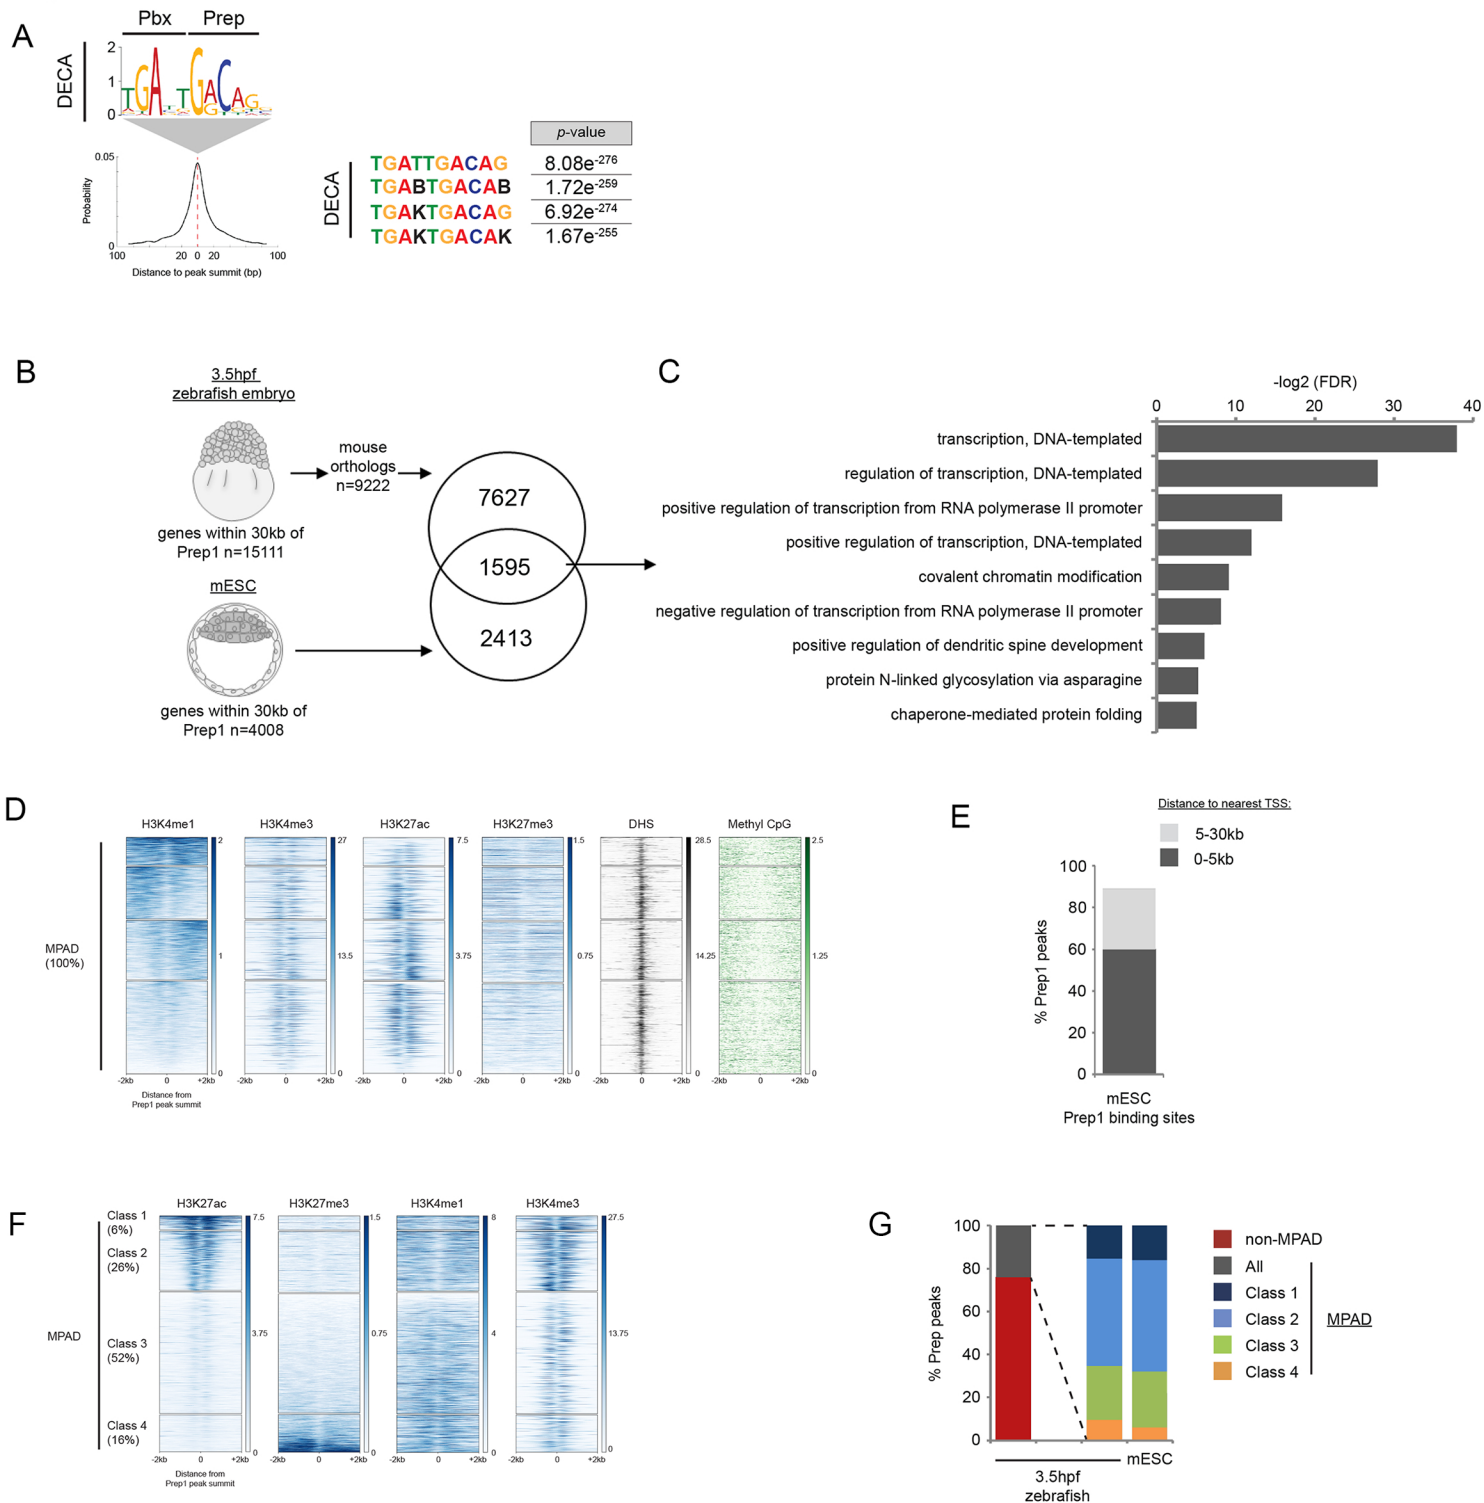

Supplement: supp [file elife-36144-supp-v1.zip]

Figure 5 - figure supplement 1

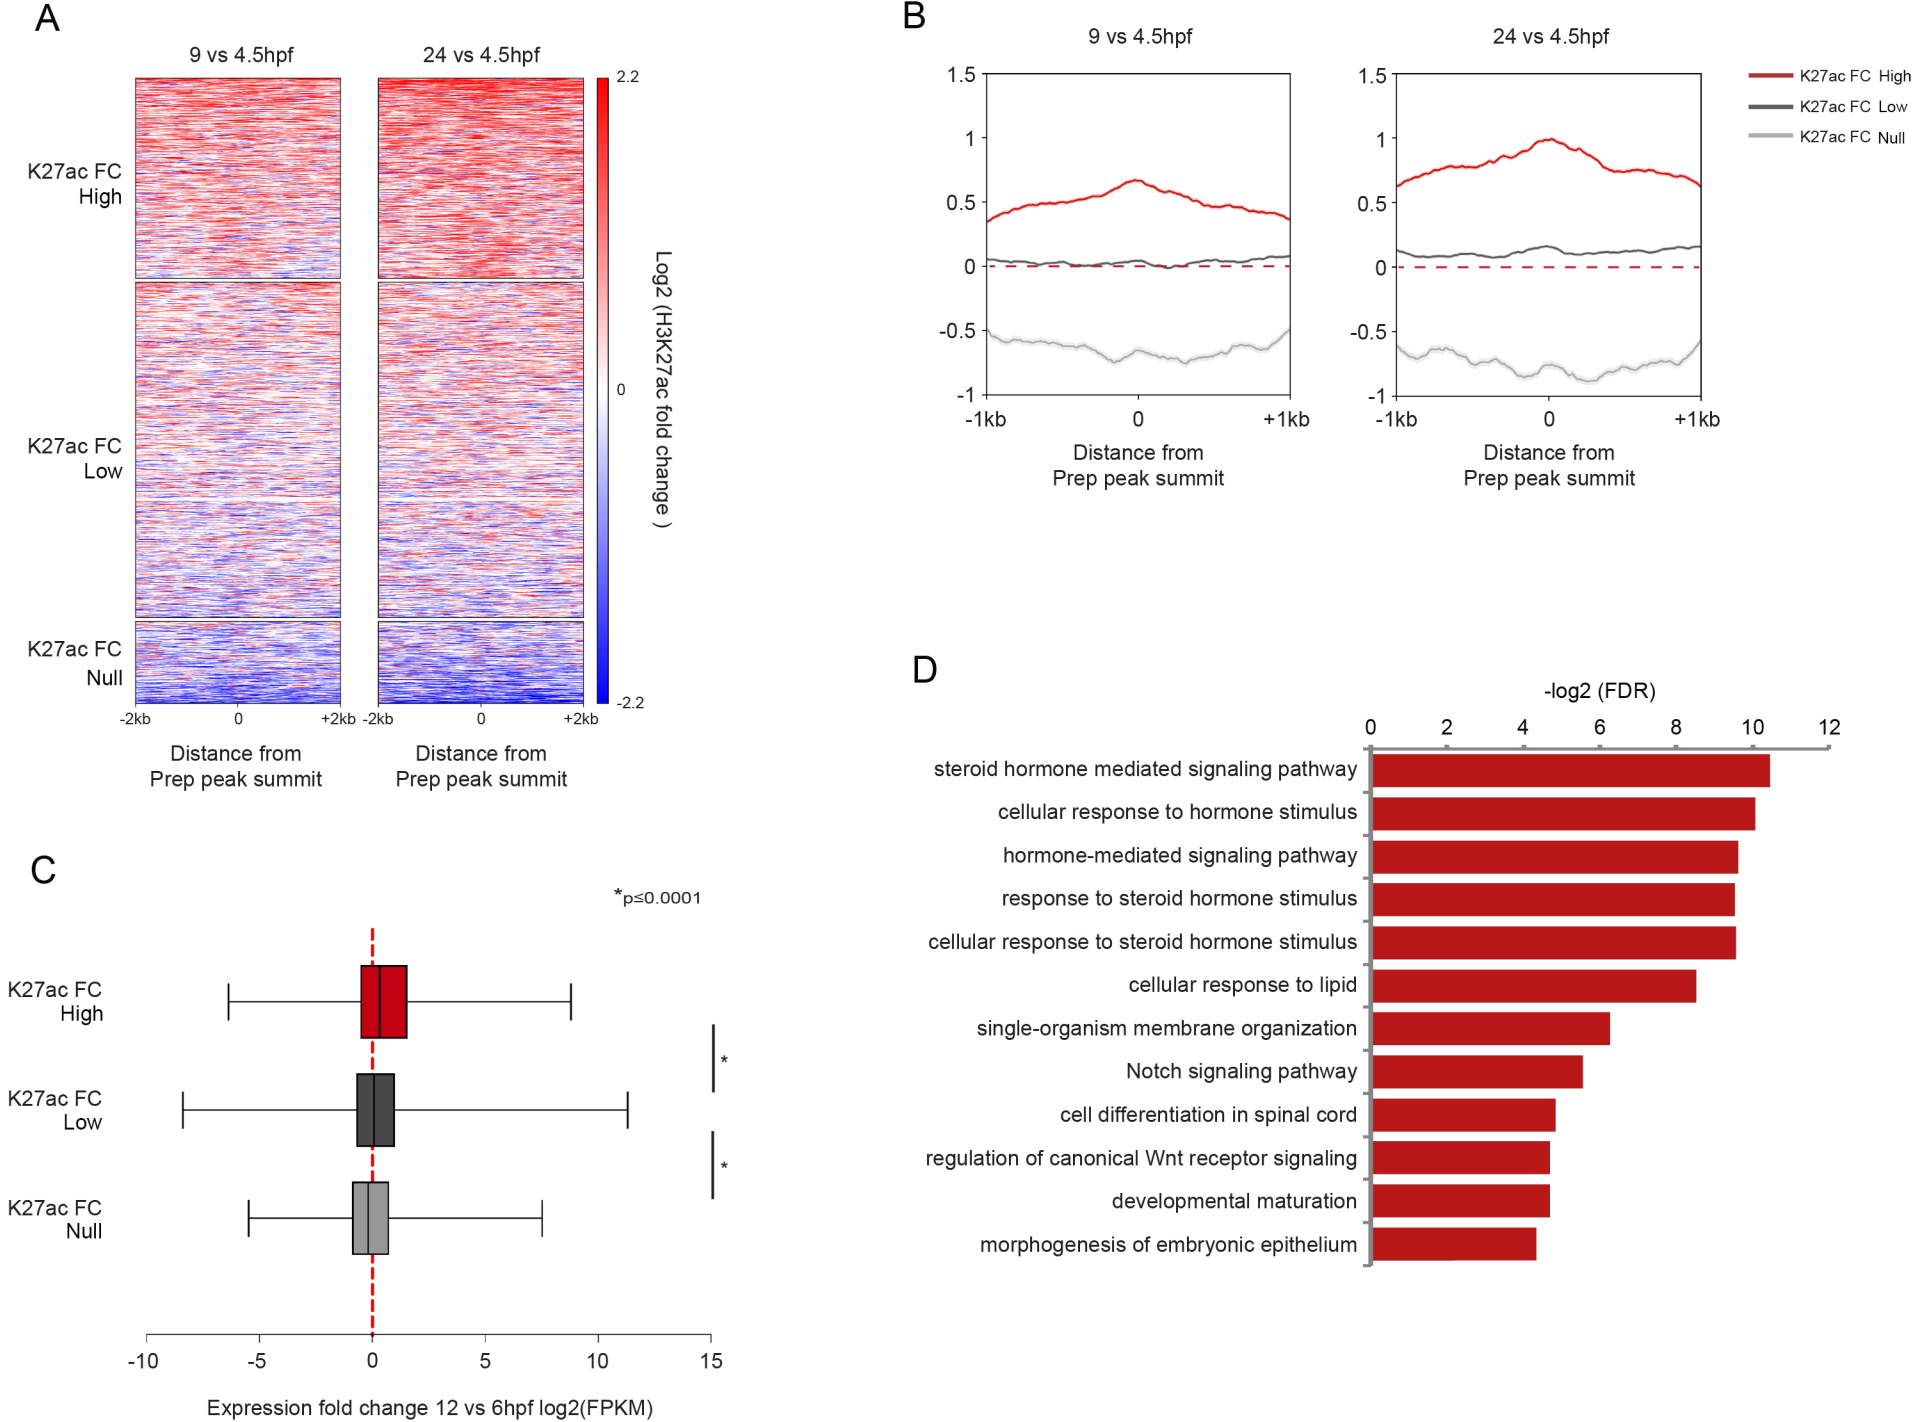

Supplement: supp [file elife-36144-supp-v1.zip]
